# Supplementary material for: Pronounced electronic modulation of geometrically-regulated metalloenediyne cyclization
Source: Royal Society of Chemistry journal article supplement (doi:10.1039/d4sc05396f), 2024-11-12
Supplement: d4sc05396f1.pdf [file d4sc05396f1.pdf]

## Supporting Information

### Pronounced Electronic Modulation of Geometrically Regulated Metalloenediyne

#### Cyclization

Sarah E. Lindahl,<sup>†</sup> Erin M. Metzger,<sup>†</sup> Chun-Hsing Chen,<sup>‡</sup> Maren Pink,<sup>‡</sup> and Jeffrey M. Zaleski\*<sup>†</sup>

<sup>†</sup>Department of Chemistry and <sup>‡</sup>Molecular Structure Center, Indiana University, Bloomington, IN 47405

**Figure 1S.** Differential scanning calorimetry traces of enediyne ligands **1a–1b** and **1d–1e** showing endothermic melting and subsequent exothermic Bergman cyclization.

**Table 1S.** Selected crystallographically determined bond lengths (Å) and angles (°) for phosphine enediyne ligands **1d–1e** and phosphine oxide derivatives **2d–2e**.

**Table 2S.** Selected crystallographically determined bond lengths (Å) and angles (°) for the Pt(II) phosphine enediyne-bridged dimer **5d**.

**Table 3S.** Selected crystallographically determined bond lengths (Å) and angles (°) for Pt(II) phosphine enediyne dichloride complexes **3e** and **3f**.

**Figure 2S.** Summary of temperature-dependent Bergman cyclization kinetics (via <sup>31</sup>P NMR) for complexes **3a–3g**.

**Figure 3S.** X-ray crystallographic structures of cyclized Pt(II) phosphine dichloride complexes **4a** and **4c–4e**, isolated from cyclization reactions of the corresponding metalloenediyne.

**Table 4S.** Selected crystallographically determined bond lengths (Å) and angles (°) for Bergman cyclized Pt(II) phosphine enediyne products **4a** and **4c–4f**.

**Figure 4S.** Eyring plots for complexes **3b – 3e** and **3g** used to derive activation parameters  $\Delta H^\ddagger$ ,  $T\Delta S^\ddagger$ , and  $\Delta G^\ddagger$ .

**Table 5S.** Summary of crystal data for **1d**.

**Table 6S.** Summary of crystal data for **1e**.

**Table 7S.** Summary of crystal data for **2d**.

**Table 8S.** Summary of crystal data for **2e**.

**Table 9S.** Summary of crystal data for **3e**.

**Table 10S.** Summary of crystal data for **3f**.

**Table 11S.** Summary of crystal data for **4a**.

**Table 12S.** Summary of crystal data for **4c**.

**Table 13S.** Summary of crystal data for **4d**.

**Table 14S.** Summary of crystal data for **4e**.

**Table 15S.** Summary of crystal data for **4f**.

**Table 16S.** Summary of crystal data for **5d**.

**Table 17S.** Summary of computational results for **3a–3e**.

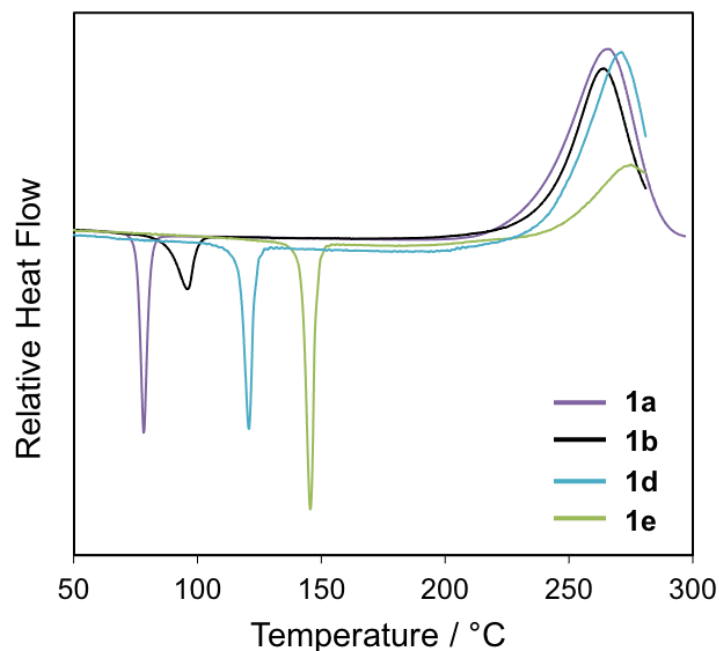

**Figure 1S.** Differential scanning calorimetry traces of enediyne ligands **1a–1b** and **1d–1e** showing endothermic melting and subsequent exothermic Bergman cyclization.

**Table 1S.** Selected crystallographically determined bond lengths (Å) and angles (°) for phosphine enediyne ligands **1d–1e** and phosphine oxide derivatives **2d–2e**.

|              | <b>1d</b> | <b>1e</b> | <b>2d</b> | <b>2e</b> |
|--------------|-----------|-----------|-----------|-----------|
| P1–C1        | 1.77      | 1.76      | 1.76      | 1.74      |
| P2–C10       | 1.77      | 1.76      | 1.757     | 1.75      |
| P1–O1        | ---       | ---       | 1.48      | 1.47      |
| P2–O2        | ---       | ---       | 1.48      | 1.47      |
| interalkynyl | 4.09      | 4.20      | 4.21      | 3.94      |
| C3–C2≡C1     | 179.26    | 177.12    | 177.18    | 178.10    |
| C8–C9≡C10    | 174.85    | 177.12    | 177.97    | 176.35    |
| C2≡C1–P1     | 170.18    | 172.72    | 179.24    | 169.36    |
| C9≡C10–P2    | 175.88    | 172.72    | 173.99    | 169.26    |

**Table 2S.** Selected crystallographically determined bond lengths (Å) and angles (°) for the Pt(II) phosphine enediyne-bridged dimer **5d**.

| <b>5d</b>            |        |
|----------------------|--------|
| Pt1–P1               | 2.23   |
| Pt1–P2               | 2.24   |
| Pt1–Cl1              | 2.35   |
| Pt1–Cl2              | 2.34   |
| interalkynyl         | 4.53   |
| P1–Pt–P2             | 92.71  |
| P1–Pt–Cl1            | 88.84  |
| P1–Pt–Cl2            | 173.48 |
| P2–Pt–Cl1            | 174.23 |
| P2–Pt–Cl2            | 174.23 |
| Cl1–Pt–Cl1           | 90.14  |
| C–C≡C <sub>avg</sub> | 168.64 |
| C≡C–P <sub>avg</sub> | 163.34 |

**Table 3S.** Selected crystallographically determined bond lengths (Å) and angles (°) for Pt(II) phosphine enediyne dichloride complexes **3e** and **3f**.

|              | <b>3e</b> | <b>3f</b> |
|--------------|-----------|-----------|
| Pt1–P1       | 2.24      | 2.25      |
| Pt1–P2       | 2.24      | 2.26      |
| Pt1–Cl1      | 2.33      | 2.35      |
| Pt1–Cl2      | 2.33      | 2.36      |
| interalkynyl | 3.13      | 3.10      |
| P1–Pt–P2     | 105.24    | 104.36    |
| P1–Pt–Cl1    | 83.36     | 84.94     |
| P1–Pt–Cl2    | 172.55    | 172.33    |
| P2–Pt–Cl1    | 171.11    | 170.52    |
| P2–Pt–Cl2    | 81.80     | 83.26     |
| Cl1–Pt–Cl1   | 89.52     | 87.48     |
| C2≡C1–P1     | 173.73    | 173.41    |
| C9≡C10–P2    | 174.34    | 174.29    |

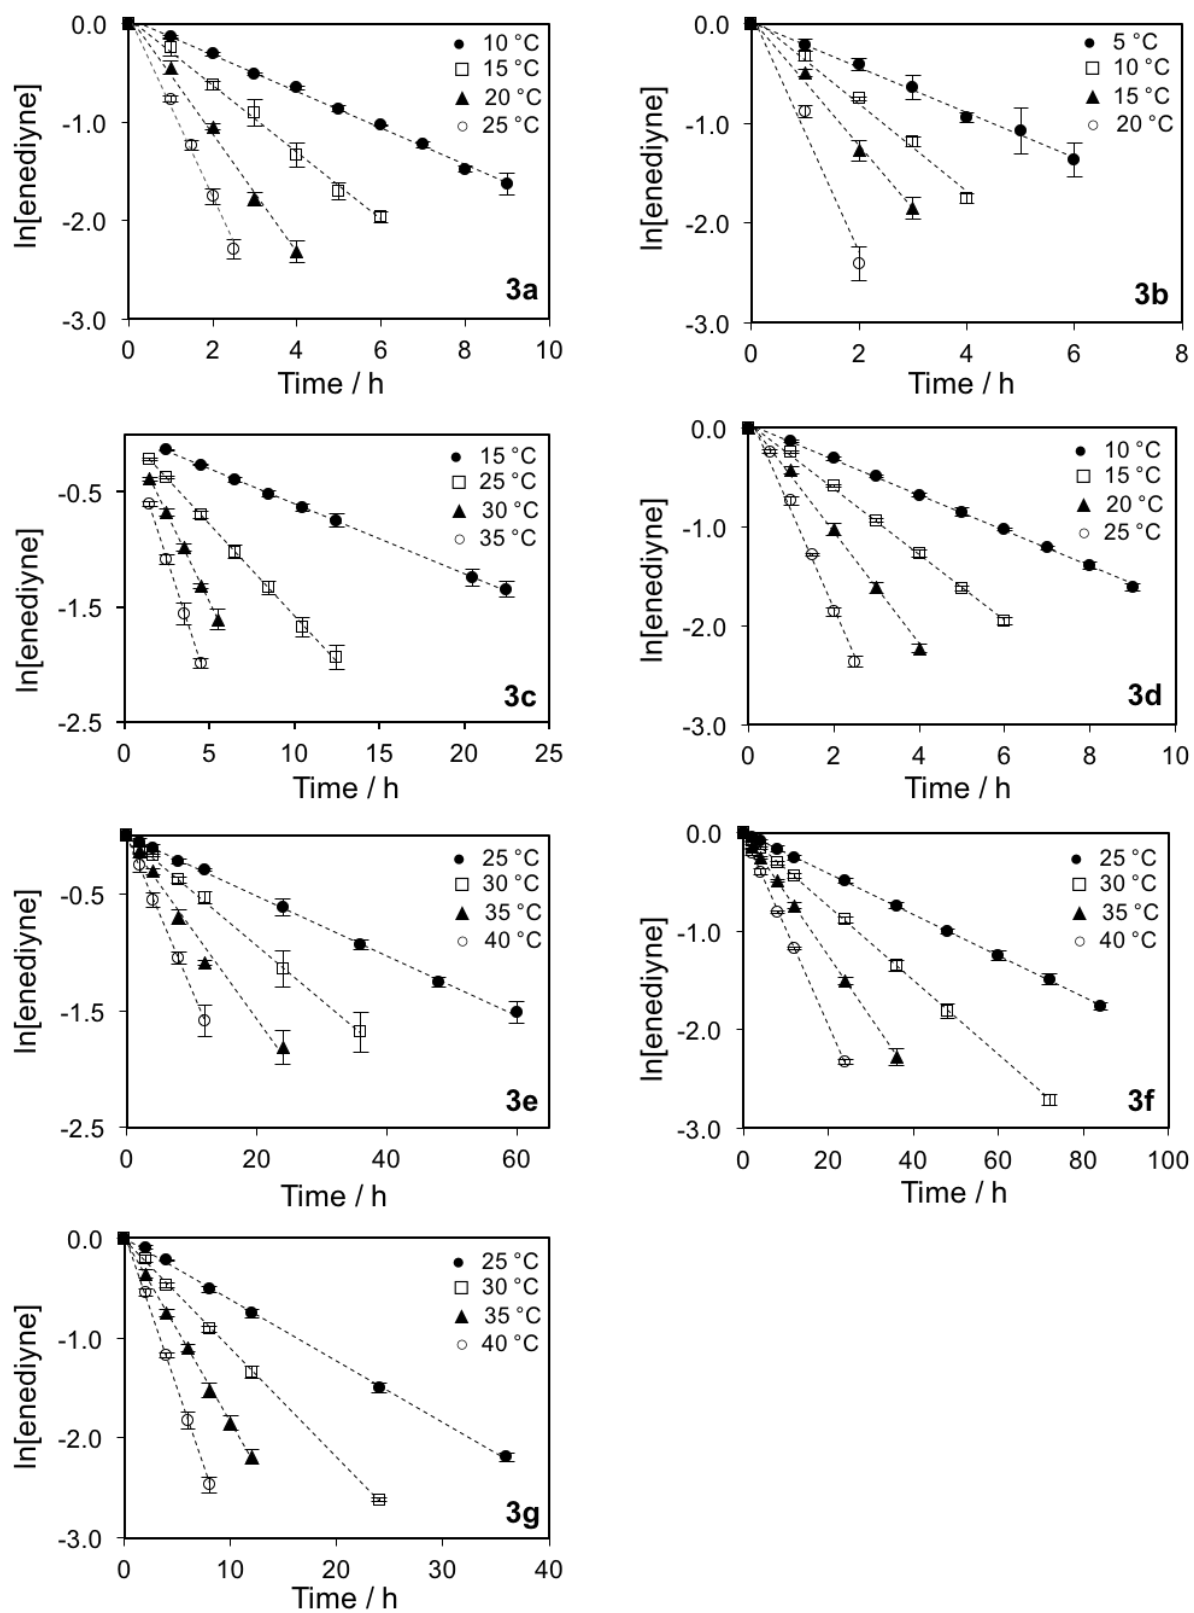

**Figure 2S.** Summary of temperature-dependent Bergman cyclization kinetics (via  $^{31}\text{P}$  NMR) for complexes **3a–3g**.

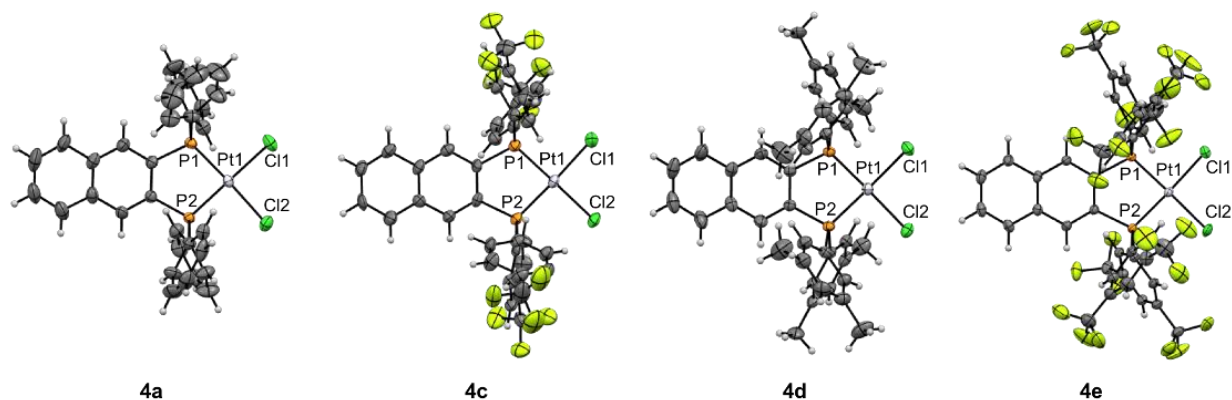

**Figure 3S.** X-ray crystallographic structures of cyclized Pt(II) phosphine dichloride complexes **4a** and **4c–4e**, isolated from cyclization reactions of the corresponding metalloenediyne. Thermal ellipsoids for all complexes are illustrated at 50% probability.

**Table 4S.** Selected crystallographically determined bond lengths (Å) and angles (°) for Bergman cyclized Pt(II) phosphine enediyne products **4a** and **4c–4f**.

|            | <b>4a</b> | <b>4c</b> | <b>4d</b> | <b>4e</b> | <b>4f</b> |
|------------|-----------|-----------|-----------|-----------|-----------|
| Pt1–P1     | 2.22      | 2.26      | 2.21      | 2.20      | 2.22      |
| Pt1–P2     | 2.22      | 2.26      | 2.21      | 2.21      | 2.22      |
| Pt1–Cl1    | 2.35      | 2.41      | 2.35      | 2.33      | 2.35      |
| Pt1–Cl2    | 2.36      | 2.41      | 2.35      | 2.34      | 2.35      |
| P1–Pt–P2   | 88.60     | 87.88     | 88.48     | 88.07     | 88.44     |
| P1–Pt–Cl1  | 91.93     | 89.51     | 89.97     | 89.55     | 92.14     |
| P1–Pt–Cl2  | 177.35    | 171.95    | 178.18    | 172.64    | 175.78    |
| P2–Pt–Cl1  | 176.94    | 174.17    | 178.18    | 175.72    | 177.34    |
| P2–Pt–Cl2  | 88.76     | 91.78     | 89.97     | 90.11     | 90.40     |
| Cl1–Pt–Cl1 | 90.72     | 91.44     | 91.62     | 92.68     | 88.84     |

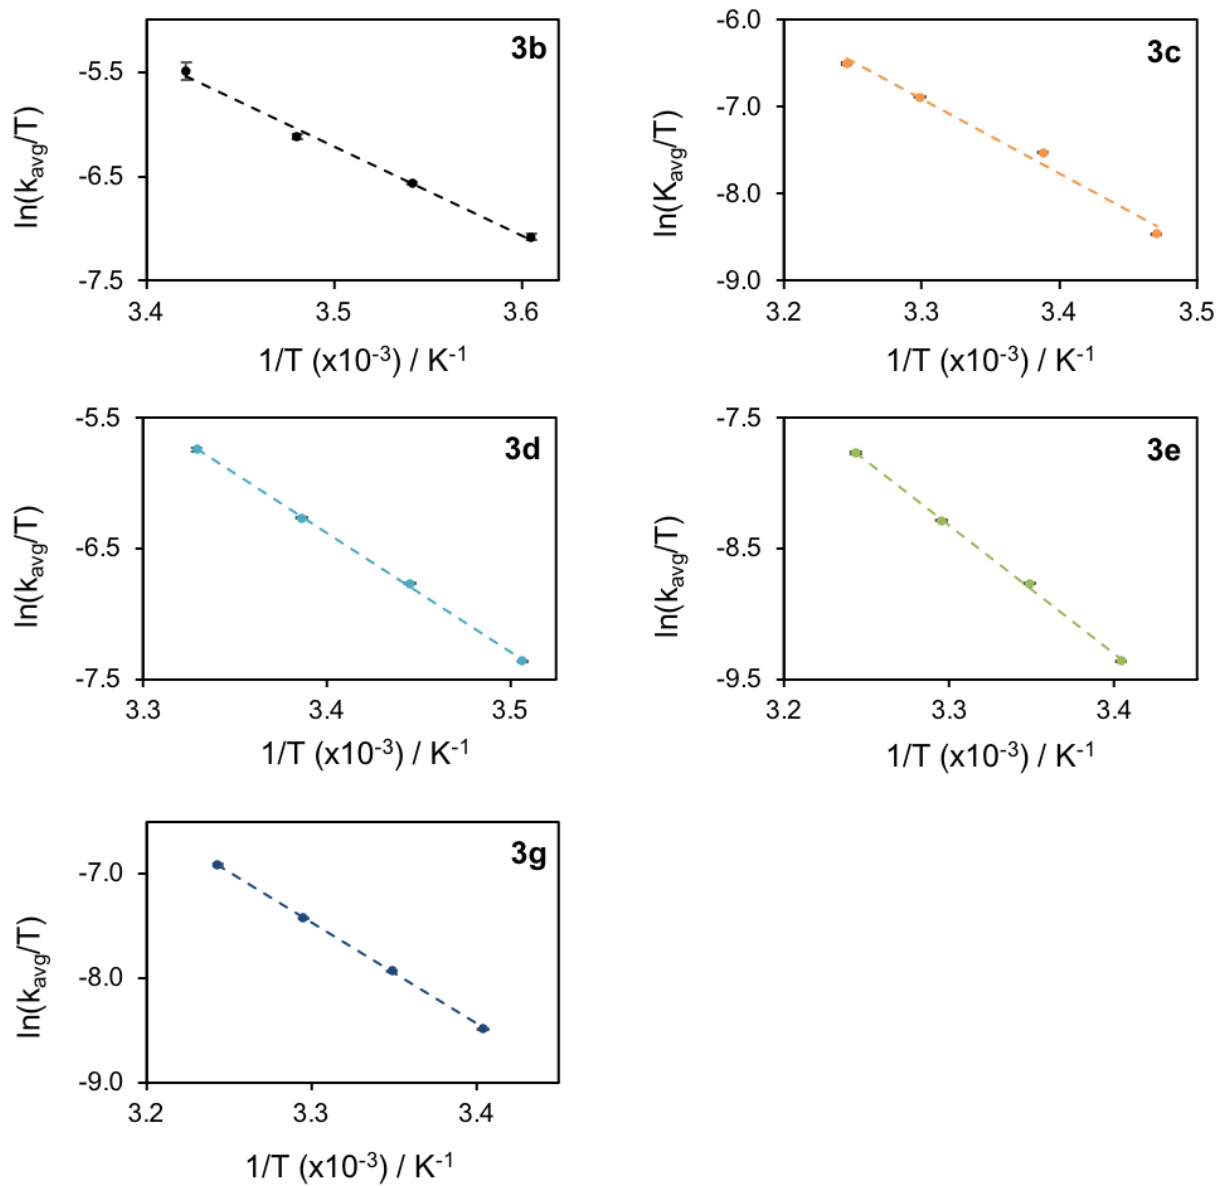

**Figure 4S.** Eyring plots for complexes **3b** – **3e** and **3g** used to derive activation parameters  $\Delta H^\ddagger$ ,  $T\Delta S^\ddagger$ , and  $\Delta G^\ddagger$ .



**Data collection, structure solution, and refinement.** Data collections were performed at IUMSC using a Bruker APEX II Kappa Duo diffractometer equipped with an APEX II detector using Mo K $\alpha$  radiation (graphite monochromator). Final cell constraints were calculated from the xyz centroids of strong reflections in the actual data after integration (SAINT).<sup>1</sup> The intensity data were corrected for absorption (SADABS).<sup>2</sup> Space groups were determined based on intensity statistics and systematic absences. Structures were solved and refined using Superflip<sup>3</sup> and the Oxford University Crystals for Windows system<sup>4</sup> or the SHELX suite of programs.<sup>5</sup> Full-matrix least squares / difference Fourier cycles were performed, which located the remaining non-hydrogen atoms. All non-hydrogen atoms were refined with anisotropic displacement parameters. The hydrogen atoms were placed in ideal positions and refined as riding atoms.

---

<sup>1</sup> SAINT, Bruker Analytical X-Ray Systems, Madison, WI, current version.

<sup>2</sup> SADABS, Bruker Analytical X-Ray Systems, Madison, WI, current version.

<sup>3</sup> Palatinus L., Chapuis G. (2007): Superflip - a computer program for the solution of crystal structures by charge flipping in arbitrary dimensions. *J. Appl. Cryst.* 40, 786-790.

<sup>4</sup> Betteridge, P. W.; Carruthers, J. R.; Cooper, R. I.; Prout, K.; Watkin, D. J. *J. Appl. Cryst.* 2003, 36, 1487.

<sup>5</sup> A short history of *SHELX*, G. M. Sheldrick, *Acta Cryst.* A64, 112 - 122 (2008).

**Table 5S.** Crystal data and structure refinement for **1d**.

|                             |                                                        |                   |
|-----------------------------|--------------------------------------------------------|-------------------|
| Empirical formula           | C <sub>42</sub> H <sub>40</sub> P <sub>2</sub>         |                   |
| Formula weight              | 606.73                                                 |                   |
| Crystal color, shape, size  | colorless plate, 0.350 x 0.300 x 0.100 mm <sup>3</sup> |                   |
| Temperature                 | 173 K                                                  |                   |
| Wavelength                  | 0.71073 Å                                              |                   |
| Crystal system, space group | Triclinic, P-1                                         |                   |
| Unit cell dimensions        | a = 9.1022(6) Å                                        | α = 91.7747(18)°. |
|                             | b = 9.6658(7) Å                                        | β = 92.4701(18)°. |
|                             | c = 20.7479(13) Å                                      | γ = 102.405(2)°.  |
| Volume                      | 1779.6(2) Å <sup>3</sup>                               |                   |
| Z                           | 2                                                      |                   |
| Density (calculated)        | 1.132 Mg/m <sup>3</sup>                                |                   |
| Absorption coefficient      | 0.149 mm <sup>-1</sup>                                 |                   |
| F(000)                      | 644                                                    |                   |

**Data Collection**

|                                 |                                  |
|---------------------------------|----------------------------------|
| Diffractometer                  | APEX II Kappa Duo, Bruker        |
| Theta range for data collection | 1.967 to 32.238°.                |
| Index ranges                    | -13<=h<=13, -14<=k<=14, 0<=l<=30 |
| Reflections collected           | 11401                            |
| Independent reflections         | 11401 [R(int) = 0.000]           |
| Observed Reflections            | 8541                             |
| Completeness to theta = 25.146° | 97.9 %                           |

**Solution and Refinement**

|                                   |                                                                                                                                                                                            |
|-----------------------------------|--------------------------------------------------------------------------------------------------------------------------------------------------------------------------------------------|
| Absorption correction             | Semi-empirical from equivalents                                                                                                                                                            |
| Max. and min. transmission        | 0.99 and 0.96                                                                                                                                                                              |
| Solution                          | Direct methods                                                                                                                                                                             |
| Refinement method                 | Full-matrix least-squares on F <sup>2</sup>                                                                                                                                                |
| Weighting scheme                  | w = [σ <sup>2</sup> F <sub>o</sub> <sup>2</sup> + AP <sup>2</sup> + BP] <sup>-1</sup> , with<br>P = (F <sub>o</sub> <sup>2</sup> + 2 F <sub>c</sub> <sup>2</sup> )/3, A = 0.111, B = 0.628 |
| Data / restraints / parameters    | 11374 / 0 / 397                                                                                                                                                                            |
| Goodness-of-fit on F <sup>2</sup> | 1.0066                                                                                                                                                                                     |
| Final R indices [I>2σ(I)]         | R1 = 0.0569, wR2 = 0.1728                                                                                                                                                                  |
| R indices (all data)              | R1 = 0.0788, wR2 = 0.1878                                                                                                                                                                  |
| Largest diff. peak and hole       | 0.48 and -0.43 e.Å <sup>-3</sup>                                                                                                                                                           |

---

Goodness-of-fit = [Σ[w(F<sub>o</sub><sup>2</sup> - F<sub>c</sub><sup>2</sup>)<sup>2</sup>]/N<sub>observns</sub> - N<sub>params</sub>]<sup>1/2</sup>, all data.

R1 = Σ(|F<sub>o</sub>| - |F<sub>c</sub>|) / Σ |F<sub>o</sub>|.      wR2 = [Σ[w(F<sub>o</sub><sup>2</sup> - F<sub>c</sub><sup>2</sup>)<sup>2</sup>] / Σ [w(F<sub>o</sub><sup>2</sup>)<sup>2</sup>]<sup>1/2</sup>.

**Table 6S.** Crystal data and structure refinement for **1e**.

|                             |                                                                |                  |
|-----------------------------|----------------------------------------------------------------|------------------|
| Empirical formula           | C <sub>42</sub> H <sub>16</sub> F <sub>24</sub> P <sub>2</sub> |                  |
| Formula weight              | 1038.49                                                        |                  |
| Crystal color, shape, size  | colorless rod, 0.300 x 0.100 x 0.100 mm <sup>3</sup>           |                  |
| Temperature                 | 173 K                                                          |                  |
| Wavelength                  | 0.71073 Å                                                      |                  |
| Crystal system, space group | Monoclinic, C2/c                                               |                  |
| Unit cell dimensions        | a = 18.2822(14) Å                                              | α = 90°.         |
|                             | b = 17.4936(12) Å                                              | β = 124.678(3)°. |
|                             | c = 15.4479(18) Å                                              | γ = 90°.         |
| Volume                      | 4063.0(7) Å <sup>3</sup>                                       |                  |
| Z                           | 4                                                              |                  |
| Density (calculated)        | 1.698 Mg/m <sup>3</sup>                                        |                  |
| Absorption coefficient      | 0.251 mm <sup>-1</sup>                                         |                  |
| F(000)                      | 2056                                                           |                  |

**Data Collection**

|                                 |                                          |
|---------------------------------|------------------------------------------|
| Diffractometer                  | APEX II Kappa Duo, Bruker                |
| Theta range for data collection | 1.786 to 30.189°.                        |
| Index ranges                    | -25 ≤ h ≤ 25, -24 ≤ k ≤ 24, -21 ≤ l ≤ 21 |
| Reflections collected           | 22482                                    |
| Independent reflections         | 5994 [R(int) = 0.037]                    |
| Observed Reflections            | 4958                                     |
| Completeness to theta = 29.585° | 99.9 %                                   |

**Solution and Refinement**

|                                   |                                                                                                                                                                                            |
|-----------------------------------|--------------------------------------------------------------------------------------------------------------------------------------------------------------------------------------------|
| Absorption correction             | Semi-empirical from equivalents                                                                                                                                                            |
| Max. and min. transmission        | 0.98 and 0.98                                                                                                                                                                              |
| Solution                          | Direct methods                                                                                                                                                                             |
| Refinement method                 | Full-matrix least-squares on F <sup>2</sup>                                                                                                                                                |
| Weighting scheme                  | w = [σ <sup>2</sup> F <sub>o</sub> <sup>2</sup> + AP <sup>2</sup> + BP] <sup>-1</sup> , with<br>P = (F <sub>o</sub> <sup>2</sup> + 2 F <sub>c</sub> <sup>2</sup> )/3, A = 0.086, B = 8.675 |
| Data / restraints / parameters    | 5976 / 60 / 320                                                                                                                                                                            |
| Goodness-of-fit on F <sup>2</sup> | 0.9940                                                                                                                                                                                     |
| Final R indices [I > 2σ(I)]       | R1 = 0.0634, wR2 = 0.1648                                                                                                                                                                  |
| R indices (all data)              | R1 = 0.0754, wR2 = 0.1765                                                                                                                                                                  |
| Largest diff. peak and hole       | 0.95 and -0.78 e.Å <sup>-3</sup>                                                                                                                                                           |

---

Goodness-of-fit = [Σ[w(F<sub>o</sub><sup>2</sup> - F<sub>c</sub><sup>2</sup>)<sup>2</sup>]/N<sub>observns</sub> - N<sub>params</sub>]<sup>1/2</sup>, all data.

R1 = Σ(|F<sub>o</sub>| - |F<sub>c</sub>|) / Σ |F<sub>o</sub>|.      wR2 = [Σ[w(F<sub>o</sub><sup>2</sup> - F<sub>c</sub><sup>2</sup>)<sup>2</sup>] / Σ [w(F<sub>o</sub><sup>2</sup>)<sup>2</sup>]<sup>1/2</sup>.

**Table 7S.** Crystal data and structure refinement for **2d**.

|                             |                                                                               |                 |
|-----------------------------|-------------------------------------------------------------------------------|-----------------|
| Empirical formula           | C <sub>43</sub> H <sub>42</sub> Cl <sub>2</sub> O <sub>2</sub> P <sub>2</sub> |                 |
| Formula weight              | 723.60                                                                        |                 |
| Crystal color, shape, size  | colorless block, 0.32 × 0.31 × 0.31 mm <sup>3</sup>                           |                 |
| Temperature                 | 173(2) K                                                                      |                 |
| Wavelength                  | 0.71073 Å                                                                     |                 |
| Crystal system, space group | Monoclinic, P2 <sub>1</sub> /c                                                |                 |
| Unit cell dimensions        | a = 8.7241(4) Å                                                               | α = 90°.        |
|                             | b = 18.1674(9) Å                                                              | β = 90.885(2)°. |
|                             | c = 24.8336(12) Å                                                             | γ = 90°.        |
| Volume                      | 3935.5(3) Å <sup>3</sup>                                                      |                 |
| Z                           | 4                                                                             |                 |
| Density (calculated)        | 1.221 Mg/m <sup>3</sup>                                                       |                 |
| Absorption coefficient      | 0.281 mm <sup>-1</sup>                                                        |                 |
| F(000)                      | 1520                                                                          |                 |

**Data Collection**

|                                 |                                          |
|---------------------------------|------------------------------------------|
| Diffractometer                  | APEX II Kappa Duo, Bruker                |
| Theta range for data collection | 1.389 to 30.146°.                        |
| Index ranges                    | -11 ≤ h ≤ 12, -25 ≤ k ≤ 25, -35 ≤ l ≤ 26 |
| Reflections collected           | 36046                                    |
| Independent reflections         | 11598 [R <sub>int</sub> = 0.0273]        |
| Observed Reflections            | 9575                                     |
| Completeness to theta = 25.242° | 99.9 %                                   |

**Solution and Refinement**

|                                   |                                                                                                                                                                                              |
|-----------------------------------|----------------------------------------------------------------------------------------------------------------------------------------------------------------------------------------------|
| Absorption correction             | Semi-empirical from equivalents                                                                                                                                                              |
| Max. and min. transmission        | 0.7460 and 0.6394                                                                                                                                                                            |
| Solution                          | Intrinsic methods                                                                                                                                                                            |
| Refinement method                 | Full-matrix least-squares on F <sup>2</sup>                                                                                                                                                  |
| Weighting scheme                  | w = [σ <sup>2</sup> F <sub>o</sub> <sup>2</sup> + AP <sup>2</sup> + BP] <sup>-1</sup> , with<br>P = (F <sub>o</sub> <sup>2</sup> + 2 F <sub>c</sub> <sup>2</sup> )/3, A = 0.0604, B = 2.4590 |
| Data / restraints / parameters    | 11598 / 25 / 475                                                                                                                                                                             |
| Goodness-of-fit on F <sup>2</sup> | 1.037                                                                                                                                                                                        |
| Final R indices [I > 2σ(I)]       | R1 = 0.0463, wR2 = 0.1220                                                                                                                                                                    |
| R indices (all data)              | R1 = 0.0592, wR2 = 0.1316                                                                                                                                                                    |
| Largest diff. peak and hole       | 0.733 and -0.585 e.Å <sup>-3</sup>                                                                                                                                                           |

---

Goodness-of-fit = [Σ[w(F<sub>o</sub><sup>2</sup> - F<sub>c</sub><sup>2</sup>)<sup>2</sup>]/N<sub>observns</sub> - N<sub>params</sub>]<sup>1/2</sup>, all data.

R1 = Σ(|F<sub>o</sub>| - |F<sub>c</sub>|) / Σ |F<sub>o</sub>|.      wR2 = [Σ[w(F<sub>o</sub><sup>2</sup> - F<sub>c</sub><sup>2</sup>)<sup>2</sup>] / Σ [w(F<sub>o</sub><sup>2</sup>)<sup>2</sup>]<sup>1/2</sup>.

**Table 8S.** Crystal data and structure refinement for **2e**.

|                             |                                                      |                 |
|-----------------------------|------------------------------------------------------|-----------------|
| Empirical formula           | C47 H28 F24 O2 P2                                    |                 |
| Formula weight              | 1142.63                                              |                 |
| Crystal color, shape, size  | colourless block, 0.31 × 0.28 × 0.23 mm <sup>3</sup> |                 |
| Temperature                 | 173(2) K                                             |                 |
| Wavelength                  | 0.71073 Å                                            |                 |
| Crystal system, space group | Monoclinic, P2 <sub>1</sub> /c                       |                 |
| Unit cell dimensions        | a = 10.2044(5) Å                                     | α = 90°.        |
|                             | b = 19.1296(8) Å                                     | β = 90.207(3)°. |
|                             | c = 24.2065(12) Å                                    | γ = 90°.        |
| Volume                      | 4725.2(4) Å <sup>3</sup>                             |                 |
| Z                           | 4                                                    |                 |
| Density (calculated)        | 1.606 Mg/m <sup>3</sup>                              |                 |
| Absorption coefficient      | 0.227 mm <sup>-1</sup>                               |                 |
| F(000)                      | 2288                                                 |                 |

**Data Collection**

|                                 |                                          |
|---------------------------------|------------------------------------------|
| Diffractometer                  | APEX II Kappa Duo, Bruker                |
| Theta range for data collection | 1.357 to 27.534°.                        |
| Index ranges                    | -11 ≤ h ≤ 13, -22 ≤ k ≤ 24, -31 ≤ l ≤ 31 |
| Reflections collected           | 44739                                    |
| Independent reflections         | 10870 [R(int) = 0.0307]                  |
| Observed Reflections            | 8547                                     |
| Completeness to theta = 25.242° | 100.0 %                                  |

**Solution and Refinement**

|                                   |                                                                                                                                                                                              |
|-----------------------------------|----------------------------------------------------------------------------------------------------------------------------------------------------------------------------------------------|
| Absorption correction             | Semi-empirical from equivalents                                                                                                                                                              |
| Max. and min. transmission        | 0.7456 and 0.6601                                                                                                                                                                            |
| Solution                          | Intrinsic methods                                                                                                                                                                            |
| Refinement method                 | Full-matrix least-squares on F <sup>2</sup>                                                                                                                                                  |
| Weighting scheme                  | w = [σ <sup>2</sup> F <sub>o</sub> <sup>2</sup> + AP <sup>2</sup> + BP] <sup>-1</sup> , with<br>P = (F <sub>o</sub> <sup>2</sup> + 2 F <sub>c</sub> <sup>2</sup> )/3, A = 0.0927, B = 5.9186 |
| Data / restraints / parameters    | 10870 / 337 / 746                                                                                                                                                                            |
| Goodness-of-fit on F <sup>2</sup> | 1.018                                                                                                                                                                                        |
| Final R indices [I > 2σ(I)]       | R1 = 0.0630, wR2 = 0.1679                                                                                                                                                                    |
| R indices (all data)              | R1 = 0.0802, wR2 = 0.1821                                                                                                                                                                    |
| Largest diff. peak and hole       | 0.872 and -0.599 e.Å <sup>-3</sup>                                                                                                                                                           |

---

Goodness-of-fit = [Σ[w(F<sub>o</sub><sup>2</sup> - F<sub>c</sub><sup>2</sup>)<sup>2</sup>]/N<sub>observns</sub> - N<sub>params</sub>]<sup>1/2</sup>, all data.

R1 = Σ(|F<sub>o</sub>| - |F<sub>c</sub>|) / Σ |F<sub>o</sub>|.      wR2 = [Σ[w(F<sub>o</sub><sup>2</sup> - F<sub>c</sub><sup>2</sup>)<sup>2</sup>] / Σ [w(F<sub>o</sub><sup>2</sup>)<sup>2</sup>]<sup>1/2</sup>.

**Table 9S.** Crystal data and structure refinement for **3e**.

|                             |                                                                                                |                 |
|-----------------------------|------------------------------------------------------------------------------------------------|-----------------|
| Empirical formula           | C <sub>42</sub> H <sub>16</sub> Cl <sub>2</sub> F <sub>24</sub> P <sub>2</sub> Pt <sub>1</sub> |                 |
| Formula weight              | 1304.48                                                                                        |                 |
| Crystal color, shape, size  | colorless plate, 0.300 x 0.300 x 0.100 mm <sup>3</sup>                                         |                 |
| Temperature                 | 173 K                                                                                          |                 |
| Wavelength                  | 0.71073 Å                                                                                      |                 |
| Crystal system, space group | Monoclinic, P2 <sub>1</sub> /n                                                                 |                 |
| Unit cell dimensions        | a = 12.3782(10) Å                                                                              | α = 90°.        |
|                             | b = 21.2832(16) Å                                                                              | β = 90.947(4)°. |
|                             | c = 17.4143(15) Å                                                                              | γ = 90°.        |
| Volume                      | 4587.1(6) Å <sup>3</sup>                                                                       |                 |
| Z                           | 4                                                                                              |                 |
| Density (calculated)        | 1.889 Mg/m <sup>3</sup>                                                                        |                 |
| Absorption coefficient      | 3.375 mm <sup>-1</sup>                                                                         |                 |
| F(000)                      | 2504                                                                                           |                 |

**Data Collection**

|                                 |                                          |
|---------------------------------|------------------------------------------|
| Diffractometer                  | APEX II Kappa Duo, Bruker                |
| Theta range for data collection | 1.511 to 30.132°.                        |
| Index ranges                    | -17 ≤ h ≤ 17, -30 ≤ k ≤ 30, -24 ≤ l ≤ 23 |
| Reflections collected           | 97743                                    |
| Independent reflections         | 13502 [R(int) = 0.040]                   |
| Observed Reflections            | 12096                                    |
| Completeness to theta = 30.132° | 99.7 %                                   |

**Solution and Refinement**

|                                   |                                                                                                                                                                                             |
|-----------------------------------|---------------------------------------------------------------------------------------------------------------------------------------------------------------------------------------------|
| Absorption correction             | Semi-empirical from equivalents                                                                                                                                                             |
| Max. and min. transmission        | 0.71 and 0.71                                                                                                                                                                               |
| Solution                          | Direct methods                                                                                                                                                                              |
| Refinement method                 | Full-matrix least-squares on F <sup>2</sup>                                                                                                                                                 |
| Weighting scheme                  | w = [σ <sup>2</sup> F <sub>o</sub> <sup>2</sup> + AP <sup>2</sup> + BP] <sup>-1</sup> , with<br>P = (F <sub>o</sub> <sup>2</sup> + 2 F <sub>c</sub> <sup>2</sup> )/3, A = 0.026, B = 11.510 |
| Data / restraints / parameters    | 13460 / 177 / 705                                                                                                                                                                           |
| Goodness-of-fit on F <sup>2</sup> | 1.0357                                                                                                                                                                                      |
| Final R indices [I > 2σ(I)]       | R1 = 0.0288, wR2 = 0.0694                                                                                                                                                                   |
| R indices (all data)              | R1 = 0.0339, wR2 = 0.0723                                                                                                                                                                   |
| Largest diff. peak and hole       | 1.11 and -0.85 e.Å <sup>-3</sup>                                                                                                                                                            |

---

Goodness-of-fit = [Σ[w(F<sub>o</sub><sup>2</sup> - F<sub>c</sub><sup>2</sup>)<sup>2</sup>]/N<sub>observns</sub> - N<sub>params</sub>]<sup>1/2</sup>, all data.

R1 = Σ(|F<sub>o</sub>| - |F<sub>c</sub>|) / Σ |F<sub>o</sub>|.      wR2 = [Σ[w(F<sub>o</sub><sup>2</sup> - F<sub>c</sub><sup>2</sup>)<sup>2</sup>] / Σ [w(F<sub>o</sub><sup>2</sup>)<sup>2</sup>]<sup>1/2</sup>.

**Table 10S.** Crystal data and structure refinement for **3f**.

|                             |                                                                                |                    |
|-----------------------------|--------------------------------------------------------------------------------|--------------------|
| Empirical formula           | C <sub>22</sub> H <sub>32</sub> Cl <sub>2</sub> P <sub>2</sub> Pt <sub>1</sub> |                    |
| Formula weight              | 624.44                                                                         |                    |
| Crystal color, shape, size  | colorless plate, 0.350 x 0.250 x 0.100 mm <sup>3</sup>                         |                    |
| Temperature                 | 173 K                                                                          |                    |
| Wavelength                  | 0.71073 Å                                                                      |                    |
| Crystal system, space group | Monoclinic, P 1 21/c 1                                                         |                    |
| Unit cell dimensions        | a = 19.6329(7) Å                                                               | α = 90°.           |
|                             | b = 14.5514(5) Å                                                               | β = 113.8290(10)°. |
|                             | c = 18.4286(7) Å                                                               | γ = 90°.           |
| Volume                      | 4816.0(3) Å <sup>3</sup>                                                       |                    |
| Z                           | 8                                                                              |                    |
| Density (calculated)        | 1.722 Mg/m <sup>3</sup>                                                        |                    |
| Absorption coefficient      | 6.188 mm <sup>-1</sup>                                                         |                    |
| F(000)                      | 2448                                                                           |                    |

**Data Collection**

|                                 |                                          |
|---------------------------------|------------------------------------------|
| Diffractionmeter                | APEX II Kappa Duo, Bruker                |
| Theta range for data collection | 1.897 to 30.175°.                        |
| Index ranges                    | -26 ≤ h ≤ 27, -20 ≤ k ≤ 20, -25 ≤ l ≤ 26 |
| Reflections collected           | 56005                                    |
| Independent reflections         | 14194 [R(int) = 0.036]                   |
| Observed Reflections            | 10189                                    |
| Completeness to theta = 29.572° | 99.9 %                                   |

**Solution and Refinement**

|                                   |                                                                                                                                                                                             |
|-----------------------------------|---------------------------------------------------------------------------------------------------------------------------------------------------------------------------------------------|
| Absorption correction             | Semi-empirical from equivalents                                                                                                                                                             |
| Max. and min. transmission        | 0.54 and 0.21                                                                                                                                                                               |
| Solution                          | Direct methods                                                                                                                                                                              |
| Refinement method                 | Full-matrix least-squares on F <sup>2</sup>                                                                                                                                                 |
| Weighting scheme                  | w = [σ <sup>2</sup> F <sub>o</sub> <sup>2</sup> + AP <sup>2</sup> + BP] <sup>-1</sup> , with<br>P = (F <sub>o</sub> <sup>2</sup> + 2 F <sub>c</sub> <sup>2</sup> )/3, A = 0.009, B = 10.530 |
| Data / restraints / parameters    | 14139 / 0 / 487                                                                                                                                                                             |
| Goodness-of-fit on F <sup>2</sup> | 1.0081                                                                                                                                                                                      |
| Final R indices [I > 2σ(I)]       | R1 = 0.0236, wR2 = 0.0501                                                                                                                                                                   |
| R indices (all data)              | R1 = 0.0417, wR2 = 0.0615                                                                                                                                                                   |
| Largest diff. peak and hole       | 1.55 and -1.96 e.Å <sup>-3</sup>                                                                                                                                                            |

---

Goodness-of-fit = [Σ[w(F<sub>o</sub><sup>2</sup> - F<sub>c</sub><sup>2</sup>)<sup>2</sup>]/N<sub>observns</sub> - N<sub>params</sub>]<sup>1/2</sup>, all data.

R1 = Σ(|F<sub>o</sub>| - |F<sub>c</sub>|) / Σ |F<sub>o</sub>|.      wR2 = [Σ[w(F<sub>o</sub><sup>2</sup> - F<sub>c</sub><sup>2</sup>)<sup>2</sup>] / Σ [w(F<sub>o</sub><sup>2</sup>)<sup>2</sup>]<sup>1/2</sup>.

**Table 11S.** Crystal data and structure refinement for **4a**.

|                             |                                                                   |                 |
|-----------------------------|-------------------------------------------------------------------|-----------------|
| Empirical formula           | C <sub>35</sub> H <sub>28</sub> Cl <sub>4</sub> P <sub>2</sub> Pt |                 |
| Formula weight              | 847.40                                                            |                 |
| Crystal color, shape, size  | colorless needle, 0.35 × 0.17 × 0.15 mm <sup>3</sup>              |                 |
| Temperature                 | 253(2) K                                                          |                 |
| Wavelength                  | 0.71073 Å                                                         |                 |
| Crystal system, space group | Monoclinic, P2 <sub>1</sub> /n                                    |                 |
| Unit cell dimensions        | a = 8.9321(4) Å                                                   | α = 90°.        |
|                             | b = 25.8402(11) Å                                                 | β = 95.622(2)°. |
|                             | c = 16.2519(7) Å                                                  | γ = 90°.        |
| Volume                      | 3733.0(3) Å <sup>3</sup>                                          |                 |
| Z                           | 4                                                                 |                 |
| Density (calculated)        | 1.508 Mg/m <sup>3</sup>                                           |                 |
| Absorption coefficient      | 4.152 mm <sup>-1</sup>                                            |                 |
| F(000)                      | 1656                                                              |                 |

**Data Collection**

|                                 |                                         |
|---------------------------------|-----------------------------------------|
| Diffractometer                  | APEX II Kappa Duo, Bruker               |
| Theta range for data collection | 1.485 to 27.535°.                       |
| Index ranges                    | -11 ≤ h ≤ 7, -33 ≤ k ≤ 33, -14 ≤ l ≤ 21 |
| Reflections collected           | 36500                                   |
| Independent reflections         | 8547 [R <sub>int</sub> = 0.0399]        |
| Observed Reflections            | 7052                                    |
| Completeness to theta = 25.242° | 99.8 %                                  |

**Solution and Refinement**

|                                   |                                                                                                                                                                                               |
|-----------------------------------|-----------------------------------------------------------------------------------------------------------------------------------------------------------------------------------------------|
| Absorption correction             | Semi-empirical from equivalents                                                                                                                                                               |
| Max. and min. transmission        | 0.7456 and 0.4735                                                                                                                                                                             |
| Solution                          | Intrinsic methods                                                                                                                                                                             |
| Refinement method                 | Full-matrix least-squares on F <sup>2</sup>                                                                                                                                                   |
| Weighting scheme                  | w = [σ <sup>2</sup> F <sub>o</sub> <sup>2</sup> + AP <sup>2</sup> + BP] <sup>-1</sup> , with<br>P = (F <sub>o</sub> <sup>2</sup> + 2 F <sub>c</sub> <sup>2</sup> )/3, A = 0.0588, B = 18.5772 |
| Data / restraints / parameters    | 8547 / 205 / 410                                                                                                                                                                              |
| Goodness-of-fit on F <sup>2</sup> | 1.118                                                                                                                                                                                         |
| Final R indices [I > 2σ(I)]       | R1 = 0.0443, wR2 = 0.1265                                                                                                                                                                     |
| R indices (all data)              | R1 = 0.0563, wR2 = 0.1315                                                                                                                                                                     |
| Largest diff. peak and hole       | 1.638 and -1.953 e.Å <sup>-3</sup>                                                                                                                                                            |

---

Goodness-of-fit = [Σ[w(F<sub>o</sub><sup>2</sup> - F<sub>c</sub><sup>2</sup>)<sup>2</sup>]/N<sub>observns</sub> - N<sub>params</sub>]<sup>1/2</sup>, all data.

R1 = Σ(|F<sub>o</sub>| - |F<sub>c</sub>|) / Σ |F<sub>o</sub>|.      wR2 = [Σ[w(F<sub>o</sub><sup>2</sup> - F<sub>c</sub><sup>2</sup>)<sup>2</sup>] / Σ [w(F<sub>o</sub><sup>2</sup>)<sup>2</sup>]<sup>1/2</sup>.



**Table 12S.** Crystal data and structure refinement for **4c**.

|                             |                                                                                                |                   |
|-----------------------------|------------------------------------------------------------------------------------------------|-------------------|
| Empirical formula           | C <sub>39</sub> H <sub>24</sub> Cl <sub>4</sub> F <sub>12</sub> P <sub>2</sub> Pt <sub>1</sub> |                   |
| Formula weight              | 1119.44                                                                                        |                   |
| Crystal color, shape, size  | colorless plate, 0.300 x 0.300 x 0.100 mm <sup>3</sup>                                         |                   |
| Temperature                 | 173 K                                                                                          |                   |
| Wavelength                  | 0.71073 Å                                                                                      |                   |
| Crystal system, space group | Monoclinic, P2 <sub>1</sub> /n                                                                 |                   |
| Unit cell dimensions        | a = 10.297(3) Å                                                                                | α = 90°.          |
|                             | b = 21.652(5) Å                                                                                | β = 104.527(10)°. |
|                             | c = 19.471(5) Å                                                                                | γ = 90°.          |
| Volume                      | 4202.2(18) Å <sup>3</sup>                                                                      |                   |
| Z                           | 4                                                                                              |                   |
| Density (calculated)        | 1.769 Mg/m <sup>3</sup>                                                                        |                   |
| Absorption coefficient      | 3.752 mm <sup>-1</sup>                                                                         |                   |
| F(000)                      | 2168                                                                                           |                   |

**Data Collection**

|                                 |                                          |
|---------------------------------|------------------------------------------|
| Diffractometer                  | APEX II Kappa Duo, Bruker                |
| Theta range for data collection | 1.432 to 24.682°.                        |
| Index ranges                    | -11 ≤ h ≤ 12, -18 ≤ k ≤ 25, -22 ≤ l ≤ 21 |
| Reflections collected           | 21368                                    |
| Independent reflections         | 6984 [R(int) = 0.085]                    |
| Observed Reflections            | 4816                                     |
| Completeness to theta = 23.942° | 99.6 %                                   |

**Solution and Refinement**

|                                   |                                                                                                                                                                                             |
|-----------------------------------|---------------------------------------------------------------------------------------------------------------------------------------------------------------------------------------------|
| Absorption correction             | Semi-empirical from equivalents                                                                                                                                                             |
| Max. and min. transmission        | 0.69 and 0.32                                                                                                                                                                               |
| Solution                          | Direct methods                                                                                                                                                                              |
| Refinement method                 | Full-matrix least-squares on F <sup>2</sup>                                                                                                                                                 |
| Weighting scheme                  | w = [σ <sup>2</sup> F <sub>o</sub> <sup>2</sup> + AP <sup>2</sup> + BP] <sup>-1</sup> , with<br>P = (F <sub>o</sub> <sup>2</sup> + 2 F <sub>c</sub> <sup>2</sup> )/3, A = 0.091, B = 29.530 |
| Data / restraints / parameters    | 6947 / 79 / 551                                                                                                                                                                             |
| Goodness-of-fit on F <sup>2</sup> | 1.0016                                                                                                                                                                                      |
| Final R indices [I > 2σ(I)]       | R1 = 0.0588, wR2 = 0.1374                                                                                                                                                                   |
| R indices (all data)              | R1 = 0.0952, wR2 = 0.1642                                                                                                                                                                   |
| Largest diff. peak and hole       | 2.63 and -3.48 e.Å <sup>-3</sup>                                                                                                                                                            |

---

Goodness-of-fit = [Σ[w(F<sub>o</sub><sup>2</sup> - F<sub>c</sub><sup>2</sup>)<sup>2</sup>]/N<sub>observns</sub> - N<sub>params</sub>]<sup>1/2</sup>, all data.

R1 = Σ(|F<sub>o</sub>| - |F<sub>c</sub>|) / Σ |F<sub>o</sub>|.      wR2 = [Σ[w(F<sub>o</sub><sup>2</sup> - F<sub>c</sub><sup>2</sup>)<sup>2</sup>] / Σ [w(F<sub>o</sub><sup>2</sup>)<sup>2</sup>]<sup>1/2</sup>.

**Table 13S.** Crystal data and structure refinement for **4d**.

|                                   |                                                                                                                                                                                              |          |
|-----------------------------------|----------------------------------------------------------------------------------------------------------------------------------------------------------------------------------------------|----------|
| Empirical formula                 | C42 H42 Cl2 P2 Pt                                                                                                                                                                            |          |
| Formula weight                    | 874.68                                                                                                                                                                                       |          |
| Crystal color, shape, size        | colorless needle, 0.31 × 0.08 × 0.07 mm <sup>3</sup>                                                                                                                                         |          |
| Temperature                       | 173(2) K                                                                                                                                                                                     |          |
| Wavelength                        | 0.71073 Å                                                                                                                                                                                    |          |
| Crystal system, space group       | Orthorhombic, Pnma                                                                                                                                                                           |          |
| Unit cell dimensions              | a = 16.5978(13) Å                                                                                                                                                                            | α = 90°. |
|                                   | b = 19.5096(13) Å                                                                                                                                                                            | β = 90°. |
|                                   | c = 18.9329(14) Å                                                                                                                                                                            | γ = 90°. |
| Volume                            | 6130.8(8) Å <sup>3</sup>                                                                                                                                                                     |          |
| Z                                 | 4                                                                                                                                                                                            |          |
| Density (calculated)              | 0.948 Mg/m <sup>3</sup>                                                                                                                                                                      |          |
| Absorption coefficient            | 2.446 mm <sup>-1</sup>                                                                                                                                                                       |          |
| F(000)                            | 1744                                                                                                                                                                                         |          |
| <b>Data Collection</b>            |                                                                                                                                                                                              |          |
| Diffractometer                    | APEX II Kappa Duo, Bruker                                                                                                                                                                    |          |
| Theta range for data collection   | 1.499 to 30.145°.                                                                                                                                                                            |          |
| Index ranges                      | -23 ≤ h ≤ 21, -27 ≤ k ≤ 16, -26 ≤ l ≤ 16                                                                                                                                                     |          |
| Reflections collected             | 58454                                                                                                                                                                                        |          |
| Independent reflections           | 9289 [R(int) = 0.0581]                                                                                                                                                                       |          |
| Observed Reflections              | 6832                                                                                                                                                                                         |          |
| Completeness to theta = 25.242°   | 100.0 %                                                                                                                                                                                      |          |
| <b>Solution and Refinement</b>    |                                                                                                                                                                                              |          |
| Absorption correction             | Semi-empirical from equivalents                                                                                                                                                              |          |
| Max. and min. transmission        | 0.7460 and 0.5627                                                                                                                                                                            |          |
| Solution                          | Intrinsic methods                                                                                                                                                                            |          |
| Refinement method                 | Full-matrix least-squares on F <sup>2</sup>                                                                                                                                                  |          |
| Weighting scheme                  | w = [σ <sup>2</sup> F <sub>o</sub> <sup>2</sup> + AP <sup>2</sup> + BP] <sup>-1</sup> , with<br>P = (F <sub>o</sub> <sup>2</sup> + 2 F <sub>c</sub> <sup>2</sup> )/3, A = 0.0299, B = 3.7323 |          |
| Data / restraints / parameters    | 9289 / 0 / 218                                                                                                                                                                               |          |
| Goodness-of-fit on F <sup>2</sup> | 1.080                                                                                                                                                                                        |          |
| Final R indices [I > 2σ(I)]       | R1 = 0.0290, wR2 = 0.0698                                                                                                                                                                    |          |
| R indices (all data)              | R1 = 0.0543, wR2 = 0.0775                                                                                                                                                                    |          |
| Largest diff. peak and hole       | 1.426 and -0.774 e.Å <sup>-3</sup>                                                                                                                                                           |          |

---

Goodness-of-fit = [Σ[w(F<sub>o</sub><sup>2</sup> - F<sub>c</sub><sup>2</sup>)<sup>2</sup>]/N<sub>observns</sub> - N<sub>params</sub>]<sup>1/2</sup>, all data.

R1 = Σ(|F<sub>o</sub>| - |F<sub>c</sub>|) / Σ |F<sub>o</sub>|.      wR2 = [Σ[w(F<sub>o</sub><sup>2</sup> - F<sub>c</sub><sup>2</sup>)<sup>2</sup>] / Σ [w(F<sub>o</sub><sup>2</sup>)<sup>2</sup>]<sup>1/2</sup>.

**Table 14S.** Crystal data and structure refinement for **4e**.

|                             |                                                                                   |                 |
|-----------------------------|-----------------------------------------------------------------------------------|-----------------|
| Empirical formula           | C <sub>42</sub> H <sub>18</sub> Cl <sub>2</sub> F <sub>24</sub> P <sub>2</sub> Pt |                 |
| Formula weight              | 1306.49                                                                           |                 |
| Crystal color, shape, size  | colorless needle, 0.23 × 0.08 × 0.05 mm <sup>3</sup>                              |                 |
| Temperature                 | 173(2) K                                                                          |                 |
| Wavelength                  | 0.71073 Å                                                                         |                 |
| Crystal system, space group | Monoclinic, P2 <sub>1</sub> /c                                                    |                 |
| Unit cell dimensions        | a = 13.4013(13) Å                                                                 | α = 90°.        |
|                             | b = 23.743(2) Å                                                                   | β = 99.623(4)°. |
|                             | c = 14.4223(13) Å                                                                 | γ = 90°.        |
| Volume                      | 4524.4(7) Å <sup>3</sup>                                                          |                 |
| Z                           | 4                                                                                 |                 |
| Density (calculated)        | 1.918 Mg/m <sup>3</sup>                                                           |                 |
| Absorption coefficient      | 3.422 mm <sup>-1</sup>                                                            |                 |
| F(000)                      | 2512                                                                              |                 |

**Data Collection**

|                                 |                                          |
|---------------------------------|------------------------------------------|
| Diffractionmeter                | APEX II Kappa Duo, Bruker                |
| Theta range for data collection | 1.541 to 30.062°.                        |
| Index ranges                    | -16 ≤ h ≤ 18, -33 ≤ k ≤ 32, -20 ≤ l ≤ 14 |
| Reflections collected           | 35328                                    |
| Independent reflections         | 13121 [R <sub>int</sub> = 0.0340]        |
| Observed Reflections            | 10711                                    |
| Completeness to theta = 25.242° | 100.0 %                                  |

**Solution and Refinement**

|                                   |                                                                                                                                                                                              |
|-----------------------------------|----------------------------------------------------------------------------------------------------------------------------------------------------------------------------------------------|
| Absorption correction             | Semi-empirical from equivalents                                                                                                                                                              |
| Max. and min. transmission        | 0.7460 and 0.5481                                                                                                                                                                            |
| Solution                          | Intrinsic methods                                                                                                                                                                            |
| Refinement method                 | Full-matrix least-squares on F <sup>2</sup>                                                                                                                                                  |
| Weighting scheme                  | w = [σ <sup>2</sup> F <sub>o</sub> <sup>2</sup> + AP <sup>2</sup> + BP] <sup>-1</sup> , with<br>P = (F <sub>o</sub> <sup>2</sup> + 2 F <sub>c</sub> <sup>2</sup> )/3, A = 0.0229, B = 7.8136 |
| Data / restraints / parameters    | 13121 / 1020 / 690                                                                                                                                                                           |
| Goodness-of-fit on F <sup>2</sup> | 1.019                                                                                                                                                                                        |
| Final R indices [I > 2σ(I)]       | R1 = 0.0338, wR2 = 0.0691                                                                                                                                                                    |
| R indices (all data)              | R1 = 0.0480, wR2 = 0.0740                                                                                                                                                                    |
| Largest diff. peak and hole       | 1.272 and -1.421 e.Å <sup>-3</sup>                                                                                                                                                           |

---

Goodness-of-fit = [Σ[w(F<sub>o</sub><sup>2</sup> - F<sub>c</sub><sup>2</sup>)<sup>2</sup>]/N<sub>observns</sub> - N<sub>params</sub>]<sup>1/2</sup>, all data.

R1 = Σ(|F<sub>o</sub>| - |F<sub>c</sub>|) / Σ |F<sub>o</sub>|.      wR2 = [Σ[w(F<sub>o</sub><sup>2</sup> - F<sub>c</sub><sup>2</sup>)<sup>2</sup>] / Σ [w(F<sub>o</sub><sup>2</sup>)<sup>2</sup>]<sup>1/2</sup>.

**Table 15S.** Crystal data and structure refinement for **4f**.

|                             |                                                                                |                 |
|-----------------------------|--------------------------------------------------------------------------------|-----------------|
| Empirical formula           | C <sub>22</sub> H <sub>34</sub> Cl <sub>2</sub> P <sub>2</sub> Pt <sub>1</sub> |                 |
| Formula weight              | 626.45                                                                         |                 |
| Crystal color, shape, size  | colorless block, 0.150 x 0.100 x 0.100 mm <sup>3</sup>                         |                 |
| Temperature                 | 173 K                                                                          |                 |
| Wavelength                  | 0.71073 Å                                                                      |                 |
| Crystal system, space group | Monoclinic, P 1 2 <sub>1</sub> /n 1                                            |                 |
| Unit cell dimensions        | a = 7.5197(6) Å                                                                | α = 90°.        |
|                             | b = 17.6155(13) Å                                                              | β = 95.268(2)°. |
|                             | c = 17.7459(13) Å                                                              | γ = 90°.        |
| Volume                      | 2340.8(3) Å <sup>3</sup>                                                       |                 |
| Z                           | 4                                                                              |                 |
| Density (calculated)        | 1.778 Mg/m <sup>3</sup>                                                        |                 |
| Absorption coefficient      | 6.366 mm <sup>-1</sup>                                                         |                 |
| F(000)                      | 1232                                                                           |                 |

**Data Collection**

|                                 |                                      |
|---------------------------------|--------------------------------------|
| Diffractionmeter                | APEX II Kappa Duo, Bruker            |
| Theta range for data collection | 1.632 to 28.718°.                    |
| Index ranges                    | -10 ≤ h ≤ 10, 0 ≤ k ≤ 23, 0 ≤ l ≤ 23 |
| Reflections collected           | 5928                                 |
| Independent reflections         | 5928 [R(int) = 0.000]                |
| Observed Reflections            | 4787                                 |
| Completeness to theta = 25.272° | 99.1 %                               |

**Solution and Refinement**

|                                   |                                                                                                                                                                                             |
|-----------------------------------|---------------------------------------------------------------------------------------------------------------------------------------------------------------------------------------------|
| Absorption correction             | Semi-empirical from equivalents                                                                                                                                                             |
| Max. and min. transmission        | 0.53 and 0.53                                                                                                                                                                               |
| Solution                          | Direct methods                                                                                                                                                                              |
| Refinement method                 | Full-matrix least-squares on F <sup>2</sup>                                                                                                                                                 |
| Weighting scheme                  | w = [σ <sup>2</sup> F <sub>o</sub> <sup>2</sup> + AP <sup>2</sup> + BP] <sup>-1</sup> , with<br>P = (F <sub>o</sub> <sup>2</sup> + 2 F <sub>c</sub> <sup>2</sup> )/3, A = 0.045, B = 41.870 |
| Data / restraints / parameters    | 5910 / 0 / 244                                                                                                                                                                              |
| Goodness-of-fit on F <sup>2</sup> | 1.0824                                                                                                                                                                                      |
| Final R indices [I > 2σ(I)]       | R1 = 0.0498, wR2 = 0.1268                                                                                                                                                                   |
| R indices (all data)              | R1 = 0.0688, wR2 = 0.1448                                                                                                                                                                   |
| Largest diff. peak and hole       | 2.67 and -2.13 e.Å <sup>-3</sup>                                                                                                                                                            |

---

Goodness-of-fit = [Σ[w(F<sub>o</sub><sup>2</sup> - F<sub>c</sub><sup>2</sup>)<sup>2</sup>]/N<sub>observns</sub> - N<sub>params</sub>]<sup>1/2</sup>, all data.

R1 = Σ(|F<sub>o</sub>| - |F<sub>c</sub>|) / Σ |F<sub>o</sub>|.      wR2 = [Σ[w(F<sub>o</sub><sup>2</sup> - F<sub>c</sub><sup>2</sup>)<sup>2</sup>] / Σ [w(F<sub>o</sub><sup>2</sup>)<sup>2</sup>]<sup>1/2</sup>.

**Table 16S.** Crystal data and structure refinement for **5d**.

|                                   |                                                                                                                                                               |          |
|-----------------------------------|---------------------------------------------------------------------------------------------------------------------------------------------------------------|----------|
| Empirical formula                 | C <sub>92</sub> H <sub>96</sub> Cl <sub>20</sub> P <sub>4</sub> Pt <sub>2</sub>                                                                               |          |
| Formula weight                    | 2424.74                                                                                                                                                       |          |
| Crystal color, shape, size        | colorless plate, 0.21 × 0.19 × 0.05 mm <sup>3</sup>                                                                                                           |          |
| Temperature                       | 173(2) K                                                                                                                                                      |          |
| Wavelength                        | 0.71073 Å                                                                                                                                                     |          |
| Crystal system, space group       | Orthorhombic, Pbcn                                                                                                                                            |          |
| Unit cell dimensions              | a = 22.317(3) Å                                                                                                                                               | α = 90°. |
|                                   | b = 21.114(2) Å                                                                                                                                               | β = 90°. |
|                                   | c = 21.952(3) Å                                                                                                                                               | γ = 90°. |
| Volume                            | 10344(2) Å <sup>3</sup>                                                                                                                                       |          |
| Z                                 | 4                                                                                                                                                             |          |
| Density (calculated)              | 1.557 Mg/m <sup>3</sup>                                                                                                                                       |          |
| Absorption coefficient            | 3.322 mm <sup>-1</sup>                                                                                                                                        |          |
| F(000)                            | 4816                                                                                                                                                          |          |
| <b>Data Collection</b>            |                                                                                                                                                               |          |
| Diffractometer                    | APEX II Kappa Duo, Bruker                                                                                                                                     |          |
| Theta range for data collection   | 1.328 to 30.215°.                                                                                                                                             |          |
| Index ranges                      | -31 ≤ h ≤ 31, -29 ≤ k ≤ 29, -30 ≤ l ≤ 30                                                                                                                      |          |
| Reflections collected             | 192734                                                                                                                                                        |          |
| Independent reflections           | 15230 [R <sub>int</sub> = 0.0627]                                                                                                                             |          |
| Observed Reflections              | 11540                                                                                                                                                         |          |
| Completeness to theta = 25.242°   | 100.0 %                                                                                                                                                       |          |
| <b>Solution and Refinement</b>    |                                                                                                                                                               |          |
| Absorption correction             | Semi-empirical from equivalents                                                                                                                               |          |
| Max. and min. transmission        | 0.7460 and 0.4889                                                                                                                                             |          |
| Solution                          | Intrinsic methods                                                                                                                                             |          |
| Refinement method                 | Full-matrix least-squares on F <sup>2</sup>                                                                                                                   |          |
| Weighting scheme                  | w = [σ <sup>2</sup> F <sub>o</sub> <sup>2</sup> + BP] <sup>-1</sup> , with P = (F <sub>o</sub> <sup>2</sup> + 2 F <sub>c</sub> <sup>2</sup> )/3, B = 124.6135 |          |
| Data / restraints / parameters    | 15230 / 821 / 740                                                                                                                                             |          |
| Goodness-of-fit on F <sup>2</sup> | 1.176                                                                                                                                                         |          |
| Final R indices [I > 2σ(I)]       | R1 = 0.0598, wR2 = 0.1282                                                                                                                                     |          |
| R indices (all data)              | R1 = 0.0856, wR2 = 0.1403                                                                                                                                     |          |
| Largest diff. peak and hole       | 2.476 and -1.738 e.Å <sup>-3</sup>                                                                                                                            |          |

---

Goodness-of-fit = [Σ[w(F<sub>o</sub><sup>2</sup> - F<sub>c</sub><sup>2</sup>)<sup>2</sup>]/N<sub>observns</sub> - N<sub>params</sub>]<sup>1/2</sup>, all data.

R1 = Σ(|F<sub>o</sub>| - |F<sub>c</sub>|) / Σ |F<sub>o</sub>|.      wR2 = [Σ[w(F<sub>o</sub><sup>2</sup> - F<sub>c</sub><sup>2</sup>)<sup>2</sup>] / Σ [w(F<sub>o</sub><sup>2</sup>)<sup>2</sup>]<sup>1/2</sup>.

**Table 17S.** Summary of computational results for **3a–3e**.**3a**

Imaginary frequencies: n/a

Total Energy = -3032.24383746 a.u.

Zero-point vibrational energy = 288.86275 kcal/mol

Sum of electronic and zero-point Energies = -3031.783505

Sum of electronic and thermal Energies = -3031.745938

Sum of electronic and thermal Enthalpies = -3031.744994

Sum of electronic and thermal Free Energies = -3031.858598

|    |             |             |             |    |             |             |             |
|----|-------------|-------------|-------------|----|-------------|-------------|-------------|
| Pt | -0.00000400 | -1.33533200 | -0.47501000 | H  | -3.12015600 | -3.12036100 | 3.72674800  |
| P  | 1.83470200  | -0.03150300 | 0.03671400  | C  | -2.56580600 | -1.77107200 | 2.13589600  |
| P  | -1.83470100 | -0.03149100 | 0.03671400  | H  | -2.14918500 | -2.55552100 | 1.49993800  |
| C  | 2.55901100  | -0.43388900 | 1.68790600  | C  | -3.19772500 | -0.10859200 | -1.20740800 |
| C  | 3.09769300  | 0.58111400  | 2.50552800  | C  | -4.54306800 | 0.01356100  | -0.81616900 |
| H  | 3.07800000  | 1.62005500  | 2.16885900  | H  | -4.80519900 | 0.07667200  | 0.24210100  |
| C  | 3.64603800  | 0.25892200  | 3.75507600  | C  | -5.55105800 | 0.03938900  | -1.79121100 |
| H  | 4.05934200  | 1.05155100  | 4.38392900  | H  | -6.59671500 | 0.12206200  | -1.48425100 |
| C  | 3.65709100  | -1.07214100 | 4.19708700  | C  | -5.21983300 | -0.04718700 | -3.15102700 |
| H  | 4.08099300  | -1.32066000 | 5.17343500  | H  | -6.00815900 | -0.02974800 | -3.90780100 |
| C  | 3.11765500  | -2.08209300 | 3.38624500  | C  | -3.87618300 | -0.16678500 | -3.53937800 |
| H  | 3.12013000  | -3.12036600 | 3.72676400  | H  | -3.61477100 | -0.24845200 | -4.59715600 |
| C  | 2.56579100  | -1.77108000 | 2.13590600  | C  | -2.86451800 | -0.20265500 | -2.57201500 |
| H  | 2.14916400  | -2.55553000 | 1.49995100  | H  | -1.82006000 | -0.33002100 | -2.86545500 |
| C  | 3.19772600  | -0.10861200 | -1.20740700 | Cl | -1.66029900 | -3.00455200 | -0.98516800 |
| C  | 4.54307000  | 0.01353000  | -0.81616700 | Cl | 1.66027500  | -3.00456400 | -0.98517600 |
| H  | 4.80520000  | 0.07663800  | 0.24210300  | C  | -0.71999000 | 4.19645500  | 0.08608600  |
| C  | 5.55106000  | 0.03935400  | -1.79120800 | C  | 0.72001800  | 4.19645000  | 0.08608600  |
| H  | 6.59671800  | 0.12201800  | -1.48424700 | C  | 1.41236800  | 5.42355800  | 0.07505900  |
| C  | 5.21983600  | -0.04721700 | -3.15102500 | C  | 0.70276800  | 6.63071300  | 0.06557800  |
| H  | 6.00816300  | -0.02978300 | -3.90779800 | C  | -0.70272500 | 6.63071800  | 0.06557800  |
| C  | 3.87618600  | -0.16680500 | -3.53937700 | C  | -1.41233200 | 5.42356700  | 0.07506000  |
| H  | 3.61477500  | -0.24846700 | -4.59715500 | H  | 2.50393800  | 5.41823500  | 0.07034600  |
| C  | 2.86452000  | -0.20266900 | -2.57201500 | H  | 1.24804400  | 7.57707500  | 0.05547600  |
| H  | 1.82006100  | -0.33002600 | -2.86545600 | H  | -1.24799500 | 7.57708300  | 0.05547600  |
| C  | -2.55901500 | -0.43387700 | 1.68790400  | H  | -2.50390300 | 5.41825100  | 0.07034700  |
| C  | -3.09769000 | 0.58112500  | 2.50553100  | C  | -1.34446900 | 2.91914200  | 0.09841900  |
| H  | -3.07798800 | 1.62006700  | 2.16886700  | C  | 1.34448800  | 2.91913300  | 0.09841800  |
| C  | -3.64603700 | 0.25893100  | 3.75507700  | C  | 1.60576900  | 1.71611700  | 0.12706300  |
| H  | -4.05933500 | 1.05156000  | 4.38393400  | C  | -1.60575700 | 1.71612800  | 0.12706500  |
| C  | -3.65710100 | -1.07213400 | 4.19708100  |    |             |             |             |
| H  | -4.08100600 | -1.32065600 | 5.17342700  |    |             |             |             |
| C  | -3.11767300 | -2.08208700 | 3.38623400  |    |             |             |             |

### 3a-TS

Imaginary frequencies:  $-404.46 \text{ cm}^{-1}$

Total Energy =  $-3032.21620282 \text{ a.u.}$

Zero-point vibrational energy =  $288.05573 \text{ kcal/mol}$

Sum of electronic and zero-point Energies =  $-3031.757157$

Sum of electronic and thermal Energies =  $-3031.720506$

Sum of electronic and thermal Enthalpies =  $-3031.719562$

Sum of electronic and thermal Free Energies =  $-3031.830842$

|    |             |             |             |    |             |             |             |
|----|-------------|-------------|-------------|----|-------------|-------------|-------------|
| Pt | 0.00000000  | -1.61500300 | -0.37197400 | H  | 6.23496500  | 0.97261100  | -1.60870500 |
| P  | 1.63647300  | -0.09793800 | 0.02571700  | C  | 3.71174100  | -0.32999300 | -3.51919200 |
| P  | -1.63647300 | -0.09793800 | 0.02571700  | H  | 5.75372200  | 0.25212700  | -3.95209700 |
| C  | 0.98993200  | 1.59664300  | 0.00969700  | C  | -2.80197400 | 0.86586000  | 2.45171600  |
| C  | 1.36880500  | 2.81856100  | -0.04584300 | H  | 3.50226600  | -0.66202900 | -4.53872500 |
| C  | 0.74652400  | 4.07479500  | -0.09625000 | C  | 2.71577000  | -0.43476200 | -2.53933500 |
| C  | 1.40854000  | 5.32198800  | -0.14453800 | H  | 1.73977800  | -0.86154100 | -2.77956700 |
| H  | 2.49938500  | 5.32281400  | -0.14976700 | C  | -2.43297700 | -0.25597700 | 1.68269400  |
| C  | 0.70318400  | 6.52520600  | -0.18925600 | C  | -3.42249000 | 0.68717500  | 3.69654400  |
| H  | 1.25071800  | 7.46951000  | -0.22687000 | H  | -2.59734500 | 1.87320800  | 2.08292800  |
| C  | -0.70318400 | 6.52520600  | -0.18925600 | C  | -3.67425300 | -0.60511400 | 4.18017000  |
| H  | -1.25071700 | 7.46951000  | -0.22687000 | H  | -3.70271400 | 1.56119200  | 4.28994200  |
| C  | -1.40853900 | 5.32198800  | -0.14453800 | C  | -3.30345500 | -1.72207200 | 3.41643300  |
| H  | -2.49938500 | 5.32281400  | -0.14976700 | H  | -4.15333400 | -0.74090800 | 5.15315300  |
| C  | -0.74652400 | 4.07479500  | -0.09625000 | C  | -2.68015300 | -1.55662000 | 2.17218800  |
| C  | -1.36880500 | 2.81856100  | -0.04584300 | H  | -1.73977700 | -0.86153800 | -2.77956700 |
| C  | -0.98993200 | 1.59664300  | 0.00969700  | C  | -4.97591600 | 0.18001400  | -3.18767400 |
| C  | 2.43297700  | -0.25597700 | 1.68269400  | H  | -2.38946200 | -2.42425300 | 1.57350100  |
| C  | 3.42249000  | 0.68717500  | 3.69654500  | C  | -2.98539400 | -0.01632000 | -1.22236000 |
| H  | 2.59734500  | 1.87320700  | 2.08292800  | C  | -4.25477500 | 0.49185300  | -0.88709000 |
| C  | 3.67425300  | -0.60511500 | 4.18017000  | H  | -4.47076200 | 0.80198700  | 0.13759400  |
| H  | 3.70271400  | 1.56119200  | 4.28994200  | C  | -5.24701000 | 0.58674900  | -1.87209100 |
| C  | 3.30345600  | -1.72207300 | 3.41643200  | H  | -6.23496600 | 0.97260900  | -1.60870500 |
| H  | 4.15333400  | -0.74090800 | 5.15315300  | C  | -3.71174000 | -0.32999100 | -3.51919200 |
| C  | 4.25477400  | 0.49185400  | -0.88709000 | H  | -5.75372200 | 0.25212700  | -3.95209800 |
| H  | 3.49278300  | -2.73138700 | 3.78969000  | C  | 2.80197400  | 0.86586000  | 2.45171600  |
| C  | 2.68015400  | -1.55662000 | 2.17218800  | H  | -3.50226400 | -0.66202600 | -4.53872600 |
| H  | 2.38946200  | -2.42425300 | 1.57350000  | C  | -2.71577000 | -0.43476000 | -2.53933500 |
| C  | 2.98539400  | -0.01632000 | -1.22236000 | H  | -3.49278200 | -2.73138700 | 3.78969000  |
| C  | 5.24700900  | 0.58675000  | -1.87209200 | Cl | -1.69548800 | -3.27923900 | -0.76968900 |
| H  | 4.47076100  | 0.80198900  | 0.13759400  | Cl | 1.69548800  | -3.27924000 | -0.76968900 |
| C  | 4.97591600  | 0.18001300  | -3.18767400 |    |             |             |             |

**3b**

Imaginary frequencies: n/a

Total Energy = -3490.29308795 a.u.

Zero-point vibrational energy = 368.47106 kcal/mol

Sum of electronic and zero-point Energies = -3489.705892

Sum of electronic and thermal Energies = -3489.657666

Sum of electronic and thermal Enthalpies = -3489.656722

Sum of electronic and thermal Free Energies = -3489.794680

|    |             |             |             |    |             |             |             |
|----|-------------|-------------|-------------|----|-------------|-------------|-------------|
| Pt | 0.00000400  | -0.40291000 | -1.34756800 | H  | 3.56966400  | -4.68230700 | -0.88799500 |
| P  | -1.83707300 | -0.10090300 | 0.01902500  | C  | 2.83052800  | -2.67410200 | -0.53541400 |
| P  | 1.83707200  | -0.10090400 | 0.01903600  | H  | 1.78357000  | -2.93916300 | -0.69940200 |
| C  | -2.57477100 | 1.57743300  | -0.13251000 | Cl | 1.65988800  | -0.65435600 | -3.07939900 |
| C  | -3.10713100 | 2.24198800  | 0.98838700  | Cl | -1.65986600 | -0.65436300 | -3.07941300 |
| H  | -3.07499800 | 1.76390400  | 1.97016300  | C  | 0.72018600  | -0.66408100 | 4.21184400  |
| C  | -3.67077500 | 3.52069200  | 0.87195000  | C  | -0.72021400 | -0.66407600 | 4.21184000  |
| H  | -4.07118100 | 4.00923400  | 1.76094700  | C  | -1.41178300 | -0.85472200 | 5.42478100  |
| C  | -3.70180800 | 4.15426600  | -0.38555800 | C  | -0.70277900 | -1.04048700 | 6.61790900  |
| C  | -3.16484900 | 3.49572500  | -1.51295700 | C  | 0.70273600  | -1.04049200 | 6.61791200  |
| H  | -3.19292400 | 4.00413100  | -2.47864900 | C  | 1.41174700  | -0.85473300 | 5.42478800  |
| C  | -2.60541700 | 2.22587800  | -1.38971200 | H  | -2.50342900 | -0.85946000 | 5.41856900  |
| H  | -2.19616000 | 1.71993000  | -2.26722500 | H  | -1.24827400 | -1.18951200 | 7.55249400  |
| C  | -3.17374600 | -1.33669700 | -0.24073800 | H  | 1.24822600  | -1.18952200 | 7.55250000  |
| C  | -4.52513600 | -0.99610100 | -0.07353500 | H  | 2.50339300  | -0.85947800 | 5.41858200  |
| H  | -4.80750700 | 0.03658400  | 0.14314200  | C  | 1.34568000  | -0.46544300 | 2.95056500  |
| C  | -5.53031500 | -1.96681500 | -0.19718500 | C  | -1.34570000 | -0.46543700 | 2.95055700  |
| H  | -6.57324800 | -1.67204800 | -0.07650600 | C  | -1.60017000 | -0.25988700 | 1.76314800  |
| C  | -5.17865400 | -3.29981800 | -0.48347900 | C  | 1.60015700  | -0.25989000 | 1.76315700  |
| C  | -3.81987100 | -3.64686700 | -0.64972500 | O  | -4.22038300 | 5.39751000  | -0.61957600 |
| H  | -3.56964600 | -4.68231600 | -0.88799200 | O  | -6.06970300 | -4.32853800 | -0.62568600 |
| C  | -2.83051900 | -2.67410700 | -0.53541700 | O  | 6.06971800  | -4.32852500 | -0.62566200 |
| H  | -1.78355800 | -2.93916600 | -0.69939300 | O  | 4.22038200  | 5.39750500  | -0.61958900 |
| C  | 2.57476900  | 1.57743100  | -0.13250100 | C  | 4.76948400  | 6.11158300  | 0.48910600  |
| C  | 3.10711000  | 2.24200100  | 0.98839500  | H  | 5.12160000  | 7.06812800  | 0.08266400  |
| H  | 3.07496300  | 1.76392800  | 1.97017700  | H  | 4.00955000  | 6.30437400  | 1.26661700  |
| C  | 3.67075400  | 3.52070500  | 0.87195100  | H  | 5.62136100  | 5.57267600  | 0.93992600  |
| H  | 4.07114400  | 4.00925900  | 1.76094900  | C  | 7.46015100  | -4.02671900 | -0.50311300 |
| C  | 3.70180500  | 4.15426300  | -0.38556400 | H  | 7.98676100  | -4.97618400 | -0.66302800 |
| C  | 3.16486600  | 3.49570700  | -1.51296400 | H  | 7.78707900  | -3.29665600 | -1.26412300 |
| H  | 3.19295500  | 4.00410000  | -2.47866100 | H  | 7.70723500  | -3.63912700 | 0.50117800  |
| C  | 2.60543500  | 2.22586000  | -1.38971200 | C  | -7.46013800 | -4.02673400 | -0.50315100 |
| H  | 2.19619200  | 1.71990000  | -2.26722400 | H  | -7.78706000 | -3.29667700 | -1.26416900 |
| C  | 3.17374900  | -1.33669400 | -0.24072200 | H  | -7.98674500 | -4.97620100 | -0.66306600 |
| C  | 4.52513700  | -0.99609400 | -0.07350500 | H  | -7.70723200 | -3.63913700 | 0.50113500  |
| H  | 4.80750300  | 0.03659000  | 0.14318000  | C  | -4.76950600 | 6.11157300  | 0.48911900  |
| C  | 5.53032000  | -1.96680600 | -0.19715200 | H  | -4.00958400 | 6.30435500  | 1.26664500  |
| H  | 6.57325000  | -1.67203700 | -0.07646200 | H  | -5.12161800 | 7.06812200  | 0.08268400  |
| C  | 5.17866500  | -3.29980800 | -0.48345700 | H  | -5.62138800 | 5.57265700  | 0.93991900  |
| C  | 3.81988500  | -3.64685900 | -0.64971900 |    |             |             |             |



### 3b-TS

Imaginary frequencies:  $-404.32 \text{ cm}^{-1}$

Total Energy =  $-3490.26625318 \text{ a.u.}$

Zero-point vibrational energy =  $367.65140 \text{ kcal/mol}$

Sum of electronic and zero-point Energies =  $-3489.680363$

Sum of electronic and thermal Energies =  $-3489.633027$

Sum of electronic and thermal Enthalpies =  $-3489.632083$

Sum of electronic and thermal Free Energies =  $-3489.767803$

|    |             |             |             |    |             |             |             |
|----|-------------|-------------|-------------|----|-------------|-------------|-------------|
| Pt | 0.00000000  | -0.35196500 | -1.66739700 | H  | 3.45105600  | -4.63261000 | -1.05536300 |
| P  | -1.64055600 | -0.09510400 | -0.12423500 | C  | 2.67963700  | -2.64353300 | -0.66650200 |
| P  | 1.64055600  | -0.09510400 | -0.12423500 | H  | 1.69281100  | -2.84872300 | -1.08670300 |
| C  | -2.44103200 | 1.55846100  | -0.13420400 | Cl | 1.69790700  | -0.59510800 | -3.36236400 |
| C  | -2.84025500 | 2.21691600  | 1.04301700  | Cl | -1.69790700 | -0.59510800 | -3.36236400 |
| H  | -2.65538700 | 1.75567100  | 2.01575900  | C  | 0.74595800  | -0.54691100 | 4.02992100  |
| C  | -3.46660800 | 3.47065100  | 0.99169300  | C  | -0.74595700 | -0.54691000 | 4.02992100  |
| H  | -3.75945800 | 3.95777000  | 1.92244700  | C  | -1.40810600 | -0.69280800 | 5.26966800  |
| C  | -3.69641900 | 4.08337700  | -0.25571100 | C  | -0.70323500 | -0.83119400 | 6.46607500  |
| C  | -3.29288100 | 3.43001000  | -1.44034500 | C  | 0.70323500  | -0.83119500 | 6.46607500  |
| H  | -3.47392000 | 3.92203700  | -2.39789000 | C  | 1.40810600  | -0.69280800 | 5.26966800  |
| C  | -2.66913900 | 2.18595800  | -1.38310100 | H  | -2.49904900 | -0.69873600 | 5.26987800  |
| H  | -2.36110600 | 1.68324700  | -2.30398900 | H  | -1.25085800 | -0.94296900 | 7.40457400  |
| C  | -2.96677600 | -1.35560200 | -0.16270100 | H  | 1.25085800  | -0.94297000 | 7.40457400  |
| C  | -4.25335900 | -1.08260600 | 0.33209300  | H  | 2.49904900  | -0.69873700 | 5.26987800  |
| H  | -4.49564000 | -0.08659200 | 0.70945300  | C  | 1.36934900  | -0.39945000 | 2.78128700  |
| C  | -5.24488200 | -2.07273900 | 0.33600400  | C  | -1.36934900 | -0.39945000 | 2.78128700  |
| H  | -6.23875600 | -1.83106400 | 0.71400000  | C  | -0.99207000 | -0.24845600 | 1.56711700  |
| C  | -4.94624300 | -3.35848900 | -0.15834500 | C  | 0.99207000  | -0.24845600 | 1.56711700  |
| C  | -3.65564900 | -3.63640900 | -0.65907600 | O  | -4.29253200 | 5.30144200  | -0.42754100 |
| H  | -3.45105600 | -4.63261100 | -1.05536100 | O  | -5.83111000 | -4.39916700 | -0.20463800 |
| C  | -2.67963700 | -2.64353300 | -0.66650100 | O  | 5.83111000  | -4.39916700 | -0.20463800 |
| H  | -1.69281100 | -2.84872300 | -1.08670100 | O  | 4.29253300  | 5.30144200  | -0.42754100 |
| C  | 2.44103200  | 1.55846100  | -0.13420400 | C  | 4.71494000  | 6.00956900  | 0.73903100  |
| C  | 2.84025500  | 2.21691600  | 1.04301700  | H  | 5.15977900  | 6.94440100  | 0.37529300  |
| H  | 2.65538800  | 1.75567000  | 2.01575900  | H  | 3.86479700  | 6.24553500  | 1.40292500  |
| C  | 3.46660900  | 3.47065100  | 0.99169300  | H  | 5.47342000  | 5.44325100  | 1.30765000  |
| H  | 3.75945900  | 3.95776900  | 1.92244700  | C  | 7.16304800  | -4.16604200 | 0.25693500  |
| C  | 3.69641900  | 4.08337700  | -0.25571100 | H  | 7.69600000  | -5.11537800 | 0.11970000  |
| C  | 3.29288100  | 3.43001000  | -1.44034500 | H  | 7.66528400  | -3.37833000 | -0.33121400 |
| H  | 3.47391900  | 3.92203700  | -2.39789000 | H  | 7.18202600  | -3.88990300 | 1.32595900  |
| C  | 2.66913900  | 2.18595800  | -1.38310100 | C  | -7.16304800 | -4.16604200 | 0.25693500  |
| H  | 2.36110500  | 1.68324800  | -2.30398900 | H  | -7.66528400 | -3.37833000 | -0.33121500 |
| C  | 2.96677600  | -1.35560200 | -0.16270100 | H  | -7.69600100 | -5.11537800 | 0.11970100  |
| C  | 4.25335900  | -1.08260600 | 0.33209400  | H  | -7.18202700 | -3.88990200 | 1.32595900  |
| H  | 4.49563900  | -0.08659300 | 0.70945400  | C  | -4.71493800 | 6.00956900  | 0.73903100  |
| C  | 5.24488200  | -2.07274000 | 0.33600400  | H  | -3.86479500 | 6.24553500  | 1.40292500  |
| H  | 6.23875600  | -1.83106500 | 0.71400100  | H  | -5.15977700 | 6.94440200  | 0.37529300  |
| C  | 4.94624300  | -3.35849000 | -0.15834600 | H  | -5.47341800 | 5.44325300  | 1.30765000  |
| C  | 3.65564900  | -3.63640900 | -0.65907800 |    |             |             |             |

**3c**

Imaginary frequencies: n/a

Total Energy = -4380.26441007 a.u.

Zero-point vibrational energy = 299.45343 kcal/mol

Sum of electronic and zero-point Energies = -4379.787201

Sum of electronic and thermal Energies = -4379.734378

Sum of electronic and thermal Enthalpies = -4379.733434

Sum of electronic and thermal Free Energies = -4379.889583

|   |             |             |             |    |             |             |             |
|---|-------------|-------------|-------------|----|-------------|-------------|-------------|
| C | 0.70267800  | -1.52837300 | 6.64633400  | C  | 2.88347700  | -2.69754900 | -0.57182000 |
| C | 1.41316900  | -1.26763700 | 5.46809400  | C  | 5.56450600  | -1.95863900 | -0.18096300 |
| C | 0.71983400  | -1.00152200 | 4.27101900  | H  | 4.80856100  | 0.01597900  | 0.25959100  |
| C | -0.71993600 | -1.00154700 | 4.27100600  | C  | 3.89830700  | -3.64554600 | -0.73168600 |
| C | -1.41328200 | -1.26768600 | 5.46806900  | H  | 1.84249100  | -2.97011100 | -0.75734300 |
| C | -0.70280500 | -1.52839600 | 6.64632100  | C  | 5.24045300  | -3.27705100 | -0.53659000 |
| H | 1.24760100  | -1.73563800 | 7.56978800  | H  | 6.60887700  | -1.67208000 | -0.04770200 |
| H | 2.50463600  | -1.27157700 | 5.46241600  | H  | 3.65155900  | -4.66582100 | -1.02931500 |
| H | -2.50475000 | -1.27167300 | 5.46236900  | C  | 2.55381100  | 1.51676400  | 0.05336000  |
| H | -1.24773600 | -1.73568300 | 7.56976400  | C  | 2.60846700  | 2.19717700  | -1.18046400 |
| C | -1.34298500 | -0.72433300 | 3.02339100  | C  | 3.03918100  | 2.14366400  | 1.21878700  |
| C | 1.34289500  | -0.72425000 | 3.02342300  | C  | 3.15051300  | 3.48609300  | -1.24209200 |
| C | 1.61334600  | -0.44745800 | 1.85440400  | H  | 2.23613500  | 1.71072100  | -2.08507900 |
| C | -1.61343300 | -0.44756800 | 1.85436600  | C  | 3.57849400  | 3.43389200  | 1.15184100  |
| P | -1.83291800 | -0.18476000 | 0.12602800  | H  | 2.98983300  | 1.62646000  | 2.17923200  |
| P | 1.83288300  | -0.18478600 | 0.12605200  | C  | 3.63505400  | 4.10668300  | -0.07886500 |
| C | -2.55371100 | 1.51685800  | 0.05349900  | H  | 3.19956600  | 4.00824700  | -2.19899900 |
| C | -3.03902300 | 2.14367000  | 1.21899900  | H  | 3.95863200  | 3.91566700  | 2.05413500  |
| C | -2.60831200 | 2.19741700  | -1.18024800 | Pt | -0.00000500 | -0.42996800 | -1.25123100 |
| C | -3.57823800 | 3.43394800  | 1.15220000  | Cl | -1.65993300 | -0.60779500 | -2.98357600 |
| H | -2.98971100 | 1.62635400  | 2.17938700  | Cl | 1.66002000  | -0.60790800 | -2.98346600 |
| C | -3.15025900 | 3.48638400  | -1.24172700 | C  | -4.15905800 | 5.52492900  | -0.13925200 |
| H | -2.23601800 | 1.71103800  | -2.08491800 | C  | -6.33212500 | -4.31664900 | -0.65470900 |
| C | -3.63475000 | 4.10688000  | -0.07842900 | C  | 6.33177600  | -4.31705800 | -0.65443000 |
| H | -3.95833400 | 3.91565100  | 2.05454800  | C  | 4.15947300  | 5.52468400  | -0.13985000 |
| H | -3.19927300 | 4.00865000  | -2.19857500 | F  | 4.73447600  | 5.79939100  | -1.34226800 |
| C | -3.20623100 | -1.37714100 | -0.20553600 | F  | 3.15508900  | 6.42896700  | 0.04234000  |
| C | -4.54908300 | -1.00898300 | -0.01132400 | F  | 5.09064400  | 5.76028500  | 0.82709100  |
| C | -2.88369900 | -2.69741400 | -0.57197900 | F  | 6.02007300  | -5.27886000 | -1.56553500 |
| C | -5.56467700 | -1.95831300 | -0.18112300 | F  | 6.53836600  | -4.94926400 | 0.53900200  |
| H | -4.80858300 | 0.01622400  | 0.25954000  | F  | 7.52109300  | -3.76610100 | -1.02401500 |
| C | -3.89860100 | -3.64532400 | -0.73190200 | F  | -6.53879200 | -4.94888100 | 0.53869600  |
| H | -1.84273200 | -2.97004900 | -0.75749600 | F  | -7.52139100 | -3.76558400 | -1.02429900 |
| C | -5.24072200 | -3.27673200 | -0.53681000 | F  | -6.02048200 | -5.27844400 | -1.56584200 |
| H | -6.60902700 | -1.67168100 | -0.04786000 | F  | -5.09020800 | 5.76049400  | 0.82771800  |
| H | -3.65192900 | -4.66560600 | -1.02957200 | F  | -3.15460100 | 6.42911200  | 0.04303800  |
| C | 3.20610800  | -1.37728800 | -0.20542400 | F  | -4.73404100 | 5.79981700  | -1.34163800 |
| C | 4.54898500  | -1.00922200 | -0.01122300 |    |             |             |             |

### 3c-TS

Imaginary frequencies:  $-407.20 \text{ cm}^{-1}$

Total Energy =  $-4380.23551359 \text{ a.u.}$

Zero-point vibrational energy =  $298.61669 \text{ kcal/mol}$

Sum of electronic and zero-point Energies =  $-4379.759638$

Sum of electronic and thermal Energies =  $-4379.707717$

Sum of electronic and thermal Enthalpies =  $-4379.706772$

Sum of electronic and thermal Free Energies =  $-4379.860421$

|   |             |             |             |    |             |             |             |
|---|-------------|-------------|-------------|----|-------------|-------------|-------------|
| C | 0.70310200  | -1.33519900 | 6.47363500  | C  | 2.74069100  | -2.62271300 | -0.75703700 |
| C | 1.40903900  | -1.11046100 | 5.29113800  | H  | 4.45661400  | -0.16441700 | 0.91157900  |
| C | 0.74722900  | -0.87623000 | 4.06530400  | C  | 2.43590200  | 1.51667800  | 0.02998200  |
| C | -0.74726600 | -0.87623400 | 4.06529600  | C  | 2.75589300  | 2.14659800  | 1.24855900  |
| C | -1.40908800 | -1.11047000 | 5.29112200  | C  | 2.72779400  | 2.16073700  | -1.19125400 |
| C | -0.70316300 | -1.33520400 | 6.47362700  | C  | 3.67224200  | 4.03781800  | 0.03168100  |
| H | 1.25043800  | -1.51420600 | 7.40149000  | H  | 2.51500100  | 1.66271400  | 2.19699300  |
| H | 2.49978700  | -1.11609600 | 5.29174800  | C  | 3.34901100  | 3.41473900  | -1.18495800 |
| H | -2.49983600 | -1.11611200 | 5.29172000  | C  | 3.37405600  | 3.40300100  | 1.24770500  |
| H | -1.25050900 | -1.51421400 | 7.40147600  | H  | 2.46845000  | 1.67609300  | -2.13670600 |
| C | -1.36814500 | -0.63806300 | 2.83073500  | Pt | 0.00000900  | -0.32442200 | -1.59898900 |
| C | 1.36812100  | -0.63805500 | 2.83075000  | Cl | 1.69548100  | -0.48824500 | -3.29674100 |
| C | 0.98714300  | -0.40069600 | 1.63078200  | Cl | -1.69543400 | -0.48824600 | -3.29676900 |
| C | -0.98715600 | -0.40070000 | 1.63077100  | H  | -6.22623400 | -1.91012200 | 0.84428700  |
| P | -1.63381300 | -0.14563000 | -0.04147900 | H  | -3.54646500 | -4.56350300 | -1.26760400 |
| P | 1.63381700  | -0.14563800 | -0.04146400 | H  | -3.61244300 | 3.89580600  | 2.19166000  |
| C | -2.99264900 | -1.38485600 | -0.13687500 | H  | -3.56903400 | 3.91493000  | -2.12947600 |
| C | -4.25105500 | -1.12656800 | 0.43829800  | H  | 3.61252100  | 3.89574600  | 2.19169300  |
| C | -2.74077700 | -2.62263300 | -0.75718300 | H  | 3.56905000  | 3.91493100  | -2.12944200 |
| C | -5.24947600 | -2.10575600 | 0.39893700  | H  | 3.54630400  | -4.56363800 | -1.26736200 |
| H | -4.45653100 | -0.16444500 | 0.91176600  | H  | 6.22628200  | -1.91013300 | 0.84410600  |
| C | -3.73951600 | -3.60226000 | -0.78919000 | C  | -6.09349800 | -4.38002900 | -0.29828600 |
| H | -1.77374100 | -2.80426000 | -1.22980500 | C  | -4.39069200 | 5.36962600  | 0.03341600  |
| C | -4.99285400 | -3.34538800 | -0.21051400 | C  | 4.39075800  | 5.36958500  | 0.03347300  |
| C | -2.43587700 | 1.51669700  | 0.02996400  | C  | 6.09342700  | -4.38011000 | -0.29831600 |
| C | -2.72778100 | 2.16074300  | -1.19127600 | F  | -6.93724200 | -4.30789300 | 0.77033800  |
| C | -2.75584200 | 2.14663700  | 1.24853700  | F  | -6.84967800 | -4.20402300 | -1.41791700 |
| C | -3.34898700 | 3.41475000  | -1.18498800 | F  | -5.59452400 | -5.64608300 | -0.34365800 |
| H | -2.46845500 | 1.67608400  | -2.13672600 | F  | 5.59442500  | -5.64615900 | -0.34352700 |
| C | -3.37399600 | 3.40304600  | 1.24767600  | F  | 6.84946600  | -4.20420700 | -1.41805800 |
| H | -2.51494000 | 1.66276400  | 2.19697400  | F  | 6.93730900  | -4.30790500 | 0.77019500  |
| C | -3.67219500 | 4.03784900  | 0.03164900  | F  | -5.74380000 | 5.19608500  | 0.01059300  |
| C | 2.99263100  | -1.38488800 | -0.13685000 | F  | -4.09993600 | 6.09873000  | 1.14730200  |
| C | 4.99279900  | -3.34545800 | -0.21048900 | F  | -4.06369200 | 6.12282100  | -1.05095300 |
| C | 3.73941000  | -3.60235800 | -0.78904500 | F  | 4.09983700  | 6.09876000  | 1.14727100  |
| C | 4.25108500  | -1.12657300 | 0.43820300  | F  | 4.06394100  | 6.12272100  | -1.05099200 |
| C | 5.24948900  | -2.10578000 | 0.39884100  | F  | 5.74386800  | 5.19602300  | 0.01087900  |
| H | 1.77361200  | -2.80436400 | -1.22956500 |    |             |             |             |

**3d**

Imaginary frequencies: n/a

Total Energy = -3346.73568746 a.u.

Zero-point vibrational energy = 422.67411 kcal/mol

Sum of electronic and zero-point Energies = -3346.062113

Sum of electronic and thermal Energies = -3346.008703

Sum of electronic and thermal Enthalpies = -3346.007759

Sum of electronic and thermal Free Energies = -3346.163316

|   |             |             |             |    |             |             |             |
|---|-------------|-------------|-------------|----|-------------|-------------|-------------|
| C | 0.70291100  | -2.87917400 | 6.07221600  | C  | 2.49093700  | 2.72338700  | 0.15083100  |
| C | 1.41215300  | -2.36635000 | 4.97939600  | C  | 4.05552200  | 1.23773400  | 1.28912300  |
| C | 0.71989900  | -1.84423600 | 3.86833900  | C  | 3.25661200  | 3.84187700  | 0.53993100  |
| C | -0.71983900 | -1.84421500 | 3.86835500  | H  | 1.59505600  | 2.85206100  | -0.46065500 |
| C | -1.41208300 | -2.36630900 | 4.97942800  | C  | 4.83519000  | 2.33523000  | 1.68396000  |
| C | -0.70283200 | -2.87915200 | 6.07223200  | H  | 4.35772000  | 0.22836800  | 1.58068400  |
| H | 1.24818400  | -3.28137400 | 6.92902000  | C  | 4.41790500  | 3.62691300  | 1.29889900  |
| H | 2.50377500  | -2.36421500 | 4.97427500  | H  | 5.02087600  | 4.49011900  | 1.60069900  |
| H | -2.50370500 | -2.36412400 | 4.97434000  | Pt | -0.00000100 | 0.48711100  | -1.21241400 |
| H | -1.24809600 | -3.28133000 | 6.92905100  | Cl | -1.67478900 | 1.16328200  | -2.80928900 |
| C | -1.34478300 | -1.30120800 | 2.71256800  | Cl | 1.67476100  | 1.16350600  | -2.80922300 |
| C | 1.34483300  | -1.30132200 | 2.71250100  | C  | -2.82378800 | 5.23566200  | 0.13985500  |
| C | 1.61536300  | -0.79102000 | 1.62528500  | C  | -6.09535000 | 2.14621300  | 2.50134800  |
| C | -1.61532700 | -0.79086000 | 1.62537600  | C  | -3.07183700 | -5.04239300 | -1.30820900 |
| P | -1.85847700 | -0.02509400 | 0.05205700  | C  | -6.16098300 | -1.32724600 | -2.87777700 |
| P | 1.85848900  | -0.02510100 | 0.05203800  | C  | 3.07211900  | -5.04222000 | -1.30867200 |
| C | -2.88914200 | 1.43086300  | 0.51896000  | C  | 6.16104200  | -1.32676000 | -2.87793900 |
| C | -4.05553600 | 1.23776400  | 1.28907900  | C  | 6.09533000  | 2.14615000  | 2.50142700  |
| C | -2.49113400 | 2.72335800  | 0.15045600  | C  | 2.82338500  | 5.23572100  | 0.14062400  |
| C | -4.83527200 | 2.33526100  | 1.68378000  | H  | 6.73986800  | -0.57470800 | -2.31945900 |
| H | -4.35763500 | 0.22842100  | 1.58082300  | H  | 6.82893800  | -2.16954700 | -3.10907100 |
| C | -3.25688000 | 3.84184900  | 0.53941400  | H  | 5.86653600  | -0.86198400 | -3.83366500 |
| H | -1.59529900 | 2.85200400  | -0.46110200 | H  | 6.27456800  | 1.08494100  | 2.72662100  |
| C | -4.41811200 | 3.62691600  | 1.29848400  | H  | 6.03706300  | 2.68834400  | 3.45942800  |
| H | -5.02113600 | 4.49012100  | 1.60017500  | H  | 6.98039800  | 2.53009900  | 1.96802100  |
| C | -2.97558200 | -1.24851900 | -0.76298400 | H  | 3.95888500  | -5.67827100 | -1.16151800 |
| C | -4.12001700 | -0.83254500 | -1.45975500 | H  | 2.35798600  | -5.26214000 | -0.50153200 |
| C | -2.63652800 | -2.61401600 | -0.70625300 | H  | 1.89448400  | 5.52756100  | 0.65829800  |
| C | -4.94233200 | -1.77889600 | -2.10237300 | H  | 3.59128800  | 5.98358800  | 0.38636700  |
| H | -4.36975800 | 0.22833400  | -1.51461400 | H  | 2.62162800  | 5.29430300  | -0.94031900 |
| C | -3.44017200 | -3.57449700 | -1.34102000 | H  | -2.62209300 | 5.29408300  | -0.94110900 |
| H | -1.74516200 | -2.93362600 | -0.15984200 | H  | -3.59173900 | 5.98350700  | 0.38551400  |
| C | -4.58995000 | -3.13687000 | -2.02804900 | H  | -1.89488400 | 5.52766400  | 0.65743000  |
| H | -5.22755300 | -3.87791800 | -2.52177800 | H  | -3.95859700 | -5.67850200 | -1.16128200 |
| C | 2.97565900  | -1.24839700 | -0.76310800 | H  | -6.73967400 | -0.57493700 | -2.31950800 |
| C | 4.12006100  | -0.83230000 | -1.45985700 | H  | -5.86651700 | -0.86284100 | -3.83369600 |
| C | 2.63667900  | -2.61391900 | -0.70649700 | H  | -6.82899000 | -2.17004400 | -3.10855500 |
| C | 4.94241700  | -1.77855100 | -2.10257600 | H  | -6.98047700 | 2.53001300  | 1.96793300  |
| H | 4.36974300  | 0.22859800  | -1.51462600 | H  | -6.03706900 | 2.68856000  | 3.45926200  |
| C | 3.44036200  | -3.57429900 | -1.34136400 | H  | -6.27449600 | 1.08502600  | 2.72671700  |
| H | 1.74533700  | -2.93362500 | -0.16010400 | H  | 2.60346100  | -5.35366300 | -2.25756500 |
| C | 4.59010700  | -3.13654700 | -2.02837300 | H  | -2.60290200 | -5.35381400 | -2.25697300 |
| H | 5.22773900  | -3.87751600 | -2.52218400 | H  | -2.35790000 | -5.26225200 | -0.50087800 |
| C | 2.88907300  | 1.43086300  | 0.51909600  |    |             |             |             |

### 3d-TS

Imaginary frequencies:  $-404.56 \text{ cm}^{-1}$

Total Energy =  $-3346.71070242 \text{ a.u.}$

Zero-point vibrational energy =  $422.03629 \text{ kcal/mol}$

Sum of electronic and zero-point Energies =  $-3346.038145$

Sum of electronic and thermal Energies =  $-3345.985703$

Sum of electronic and thermal Enthalpies =  $-3345.984759$

Sum of electronic and thermal Free Energies =  $-3346.138136$

|   |             |             |             |    |             |             |             |
|---|-------------|-------------|-------------|----|-------------|-------------|-------------|
| C | 0.70331400  | -1.76615300 | 6.32868900  | C  | 2.80391500  | 2.10507100  | 1.41888200  |
| C | 1.40837800  | -1.44668700 | 5.16756600  | C  | 2.64541100  | 2.39229800  | -1.00080100 |
| C | 0.74636300  | -1.11331900 | 3.96466300  | C  | 3.64207600  | 4.11775900  | 0.37268300  |
| C | -0.74622900 | -1.11331600 | 3.96468800  | H  | 2.61277400  | 1.50833100  | 2.31402900  |
| C | -1.40820500 | -1.44668300 | 5.16761300  | C  | 3.26800100  | 3.65179100  | -0.89941000 |
| C | -0.70310300 | -1.76615100 | 6.32871200  | C  | 3.41760100  | 3.36352500  | 1.54104000  |
| H | 1.25094600  | -2.01948100 | 7.23918400  | H  | 2.34181600  | 2.00413800  | -1.97756800 |
| H | 2.49927700  | -1.45222400 | 5.16693200  | Pt | -0.00002500 | -0.08519100 | -1.63977700 |
| H | -2.49910400 | -1.45221500 | 5.16701500  | H  | 4.11716000  | 5.10093100  | 0.45912400  |
| H | -1.25070600 | -2.01947700 | 7.23922600  | Cl | 1.69287800  | -0.09778900 | -3.35678100 |
| C | -1.36922800 | -0.77640000 | 2.75354000  | Cl | -1.69296000 | -0.09782600 | -3.35674900 |
| C | 1.36932400  | -0.77640300 | 2.75349400  | C  | -3.42489800 | -4.70638400 | -1.88321800 |
| C | 0.99132200  | -0.44218100 | 1.57688200  | C  | -6.64663600 | -1.78221600 | 0.74356500  |
| C | -0.99126600 | -0.44218000 | 1.57691500  | C  | -3.80273600 | 3.91178300  | 2.89880800  |
| P | -1.63655600 | -0.03584000 | -0.06969900 | C  | -3.53646200 | 4.46860800  | -2.14469000 |
| P | 1.63655600  | -0.03583100 | -0.06975300 | C  | 6.64669600  | -1.78219300 | 0.74320100  |
| C | -2.98940300 | -1.26469300 | -0.27406000 | C  | 3.42478400  | -4.70640100 | -1.88331100 |
| C | -4.25774300 | -1.04517900 | 0.29609100  | C  | 3.53588400  | 4.46885700  | -2.14471500 |
| C | -2.71843900 | -2.44874800 | -0.97659100 | C  | 3.80324200  | 3.91156000  | 2.89869000  |
| C | -5.26566500 | -2.01423800 | 0.16848400  | H  | 3.10989100  | 4.70798200  | 3.21797000  |
| H | -4.46575000 | -0.11523000 | 0.83097900  | H  | 4.81325400  | 4.35055300  | 2.88417800  |
| C | -3.71277600 | -3.43700800 | -1.11163300 | H  | 3.78407800  | 3.12878800  | 3.67092700  |
| H | -1.73867900 | -2.58508500 | -1.44100600 | H  | 7.01857800  | -2.67424600 | 1.27155000  |
| C | -4.97077800 | -3.20191900 | -0.53209500 | H  | 7.37457400  | -1.55112300 | -0.05275300 |
| H | -5.75160100 | -3.96287600 | -0.63621700 | H  | 6.65359300  | -0.94024600 | 1.45063500  |
| C | -2.42157400 | 1.61863800  | 0.15299100  | H  | 4.28897000  | -5.38639900 | -1.87945500 |
| C | -2.64559200 | 2.39220900  | -1.00076600 | H  | 3.17535600  | -4.48016900 | -2.93248400 |
| C | -2.80370500 | 2.10515800  | 1.41896200  | H  | 2.67392600  | 4.44939400  | -2.82841000 |
| C | -3.26815600 | 3.65170300  | -0.89937000 | H  | 3.75970300  | 5.51767600  | -1.90036900 |
| H | -2.34213500 | 2.00398600  | -1.97755000 | H  | 4.39663200  | 4.06474200  | -2.70338900 |
| C | -3.41734500 | 3.36364300  | 1.54112800  | H  | 2.56525600  | -5.24898000 | -1.45755500 |
| H | -2.61241400 | 1.50849300  | 2.31412600  | H  | -3.17418600 | -4.48010100 | -2.93206800 |
| C | -3.64199000 | 4.11779200  | 0.37276000  | H  | -2.56619500 | -5.24963700 | -1.45664000 |
| H | -4.11700300 | 5.10099900  | 0.45921100  | H  | -4.28953400 | -5.38581400 | -1.88041600 |
| C | 2.98939200  | -1.26468500 | -0.27417500 | H  | -2.67587200 | 4.44671500  | -2.83001100 |
| C | 4.97073200  | -3.20194100 | -0.53226800 | H  | -4.39924500 | 4.06614500  | -2.70143200 |
| C | 3.71268600  | -3.43704200 | -1.11170800 | H  | -3.75744500 | 5.51809100  | -1.90059000 |
| H | 5.75153500  | -3.96291700 | -0.63639700 | H  | -6.65349600 | -0.94023400 | 1.45095700  |
| C | 4.25777800  | -1.04515400 | 0.29586700  | H  | -7.37459200 | -1.55121400 | -0.05233600 |
| C | 5.26568300  | -2.01422800 | 0.16823000  | H  | -7.01844100 | -2.67425400 | 1.27199500  |
| H | 1.73856400  | -2.58513200 | -1.44094900 | H  | -4.81272200 | 4.35084100  | 2.88443000  |
| C | 2.71836500  | -2.44877300 | -0.97662800 | H  | -3.78350600 | 3.12904900  | 3.67108200  |
| H | 4.46583000  | -0.11518600 | 0.83070500  | H  | -3.10928400 | 4.70817500  | 3.21794200  |
| C | 2.42157300  | 1.61865000  | 0.15292800  |    |             |             |             |

**3e**

Imaginary frequencies: n/a

Total Energy = -5728.27595526 a.u.

Zero-point vibrational energy = 309.52110 kcal/mol

Sum of electronic and zero-point Energies = -5727.782702

Sum of electronic and thermal Energies = -5727.714237

Sum of electronic and thermal Enthalpies = -5727.713292

Sum of electronic and thermal Free Energies = -5727.911206

|   |             |             |             |    |             |             |             |
|---|-------------|-------------|-------------|----|-------------|-------------|-------------|
| C | -0.68412600 | 1.21539800  | 6.75737200  | C  | -2.52408800 | -2.61121000 | -0.42920700 |
| C | -1.39859400 | 1.01053000  | 5.57067700  | C  | -4.08712400 | -1.45395300 | 1.03805800  |
| C | -0.70705300 | 0.80136300  | 4.36138500  | C  | -3.30949100 | -3.77109200 | -0.33758200 |
| C | 0.73191100  | 0.80082100  | 4.35770200  | H  | -1.62026700 | -2.60151300 | -1.03967000 |
| C | 1.42979700  | 1.00959600  | 5.56340300  | C  | -4.86667800 | -2.61605600 | 1.11868700  |
| C | 0.72156000  | 1.21498500  | 6.75374100  | H  | -4.39767100 | -0.55930500 | 1.58037900  |
| H | -1.22623200 | 1.37702900  | 7.69142700  | C  | -4.48020400 | -3.77736300 | 0.43200000  |
| H | -2.48997600 | 1.01058200  | 5.56897000  | H  | -5.08725100 | -4.68065400 | 0.49778300  |
| H | 2.52115700  | 1.00890300  | 5.55597300  | Pt | -0.00326800 | -0.12691700 | -1.13907500 |
| H | 1.26855500  | 1.37633400  | 7.68499400  | Cl | 1.67111900  | -0.38633900 | -2.84088700 |
| C | 1.35002400  | 0.58229100  | 3.09630900  | Cl | -1.67780700 | -0.37260700 | -2.84295800 |
| C | -1.33190700 | 0.58424000  | 3.10301200  | C  | 2.78733600  | -5.07949600 | -0.96804200 |
| C | -1.62659800 | 0.38333900  | 1.92468200  | C  | 6.16823000  | -2.62258400 | 1.86347100  |
| C | 1.63729100  | 0.37966400  | 1.91645800  | C  | 3.16496900  | 5.20469100  | 0.30037600  |
| P | 1.85640500  | 0.05085100  | 0.20140700  | C  | 6.09471900  | 2.09559200  | -2.38212300 |
| P | -1.85637800 | 0.06117800  | 0.20983100  | C  | -3.21537000 | 5.20196100  | 0.40610400  |
| C | 2.90601000  | -1.46834000 | 0.25206000  | C  | -5.99644000 | 2.14595700  | -2.49064400 |
| C | 4.08770900  | -1.47009500 | 1.01635000  | C  | -6.09272400 | -2.64254400 | 2.00702000  |
| C | 2.49480500  | -2.63435300 | -0.41316800 | C  | -2.91835000 | -5.00352100 | -1.12905300 |
| C | 4.86008100  | -2.63694100 | 1.10048300  | F  | -5.78360000 | -3.09981000 | 3.25410200  |
| H | 4.40592400  | -0.57482700 | 1.55321000  | F  | -7.05671000 | -3.46004100 | 1.50618000  |
| C | 3.26960900  | -3.80051700 | -0.31248700 | F  | -6.63268300 | -1.40172600 | 2.15583600  |
| H | 1.58885800  | -2.62224100 | -1.02067500 | F  | -3.37151800 | -6.14139200 | -0.53244900 |
| C | 4.45244500  | -3.80516800 | 0.43858300  | F  | -1.56895500 | -5.10756100 | -1.25302800 |
| H | 5.05218100  | -4.71289100 | 0.50944600  | F  | -3.44346600 | -4.96619100 | -2.38284400 |
| C | 2.97287700  | 1.44134200  | -0.28990200 | F  | 1.96769800  | -5.77289600 | -0.12678300 |
| C | 4.07328100  | 1.23323800  | -1.13887300 | F  | 2.08770500  | -4.82914800 | -2.10263400 |
| C | 2.66847700  | 2.73643200  | 0.16214100  | F  | 3.82624800  | -5.89972800 | -1.28551000 |
| C | 4.86727100  | 2.32413300  | -1.52350400 | F  | 6.15383200  | -1.69919800 | 2.86524700  |
| H | 4.30212900  | 0.23800700  | -1.51826400 | F  | 7.21167600  | -2.31441200 | 1.04509900  |
| C | 3.46372700  | 3.82081600  | -0.23587100 | F  | 6.43524400  | -3.83486900 | 2.42036900  |
| H | 1.81190600  | 2.90948800  | 0.81563200  | F  | 1.83527700  | 5.37573900  | 0.53571800  |
| C | 4.56589700  | 3.61869200  | -1.07791500 | F  | 3.56539600  | 6.17617600  | -0.56177700 |
| H | 5.17535100  | 4.46444900  | -1.39673200 | F  | 3.81233900  | 5.42091700  | 1.48223200  |
| C | -2.96991800 | 1.45718400  | -0.27289900 | F  | 6.35188500  | 3.16646500  | -3.18075600 |
| C | -4.05746200 | 1.25702800  | -1.14038300 | F  | 7.19892600  | 1.89916900  | -1.60418300 |
| C | -2.68294600 | 2.74541500  | 0.20906900  | F  | 5.96035000  | 1.00235500  | -3.17596600 |
| C | -4.85623900 | 2.34853600  | -1.51318600 | F  | -7.00888800 | 3.02887200  | -2.26180800 |
| H | -4.28223400 | 0.26481100  | -1.52957500 | F  | -6.51380800 | 0.89051000  | -2.40238900 |
| C | -3.48530600 | 3.83002100  | -0.17397500 | F  | -5.58348100 | 2.32835300  | -3.77291400 |
| H | -1.83941400 | 2.91192800  | 0.88092200  | F  | -3.88519400 | 5.37602500  | 1.58246400  |
| C | -4.57420400 | 3.63577300  | -1.03494300 | F  | -3.61509800 | 6.19205300  | -0.43502500 |
| H | -5.19830800 | 4.47960400  | -1.32958400 | F  | -1.89224400 | 5.38429800  | 0.66857700  |
| C | -2.91568300 | -1.45149700 | 0.25804400  |    |             |             |             |

### 3e-TS

Imaginary frequencies:  $-406.58 \text{ cm}^{-1}$

Total Energy =  $-5728.24809466 \text{ a.u.}$

Zero-point vibrational energy =  $308.79840 \text{ kcal/mol}$

Sum of electronic and zero-point Energies =  $-5727.755993$

Sum of electronic and thermal Energies =  $-5727.688539$

Sum of electronic and thermal Enthalpies =  $-5727.687595$

Sum of electronic and thermal Free Energies =  $-5727.882567$

|   |             |             |             |    |             |             |             |
|---|-------------|-------------|-------------|----|-------------|-------------|-------------|
| C | -0.67951700 | 0.32150000  | 6.61503300  | C  | -2.88509900 | -2.19483500 | 0.97698100  |
| C | -1.39049900 | 0.29555000  | 5.41467500  | C  | -2.73555600 | -1.95611700 | -1.44534900 |
| C | -0.73296200 | 0.25754000  | 4.16527300  | C  | -3.78946900 | -3.92756600 | -0.47380900 |
| C | 0.76234800  | 0.24651700  | 4.16016900  | H  | -2.68814000 | -1.81970400 | 1.98246200  |
| C | 1.42893700  | 0.27514600  | 5.40502900  | C  | -3.38850000 | -3.18890600 | -1.59571700 |
| C | 0.72664300  | 0.31143100  | 6.61022300  | C  | -3.53547900 | -3.42690500 | 0.81062100  |
| H | -1.22331800 | 0.35074300  | 7.56145100  | H  | -2.41980800 | -1.38327800 | -2.32205500 |
| H | -2.48110400 | 0.30588600  | 5.42008500  | Pt | -0.00245600 | 0.52968700  | -1.52538100 |
| H | 2.51959100  | 0.26998200  | 5.40298600  | H  | -4.29041700 | -4.88736100 | -0.60027800 |
| H | 1.27729500  | 0.33295100  | 7.55287500  | Cl | -1.70659500 | 0.92119600  | -3.17013700 |
| C | 1.37708700  | 0.20360600  | 2.90112200  | Cl | 1.69081200  | 0.90052000  | -3.18621000 |
| C | -1.35678100 | 0.22413100  | 2.91041200  | C  | 3.42925600  | 5.07672700  | -0.91715500 |
| C | -0.98060000 | 0.17578000  | 1.68637600  | C  | 6.53110800  | 1.81628400  | 1.37000500  |
| C | 0.99195800  | 0.16079600  | 1.67966400  | C  | 3.82334100  | -4.32011000 | 1.99749900  |
| P | 1.63384700  | 0.15327100  | -0.01019400 | C  | 3.65245600  | -3.73215400 | -3.01950700 |
| P | -1.63351800 | 0.17665400  | 0.00074400  | C  | -6.56808600 | 1.87093300  | 1.21400700  |
| C | 2.97459600  | 1.41630500  | 0.05720500  | C  | -3.27832900 | 5.18167100  | -0.70706400 |
| C | 4.22591300  | 1.11732500  | 0.62062900  | C  | -3.70194300 | -3.69703200 | -2.99063000 |
| C | 2.70674500  | 2.70687400  | -0.43052100 | C  | -3.89790000 | -4.24956300 | 2.02932700  |
| C | 5.20595400  | 2.11752400  | 0.70211900  | F  | -2.70468600 | -3.40420500 | -3.86212400 |
| H | 4.45156600  | 0.11420300  | 0.98510700  | F  | -4.84413500 | -3.13023700 | -3.46712300 |
| C | 3.69230800  | 3.70005300  | -0.33955300 | F  | -3.88377600 | -5.04718000 | -2.99962200 |
| H | 1.74297400  | 2.92699300  | -0.89171800 | F  | -4.19249000 | -3.45609500 | 3.09759700  |
| C | 4.94211600  | 3.40981800  | 0.22559200  | F  | -2.86540800 | -5.05682200 | 2.40178800  |
| H | 5.70720700  | 4.18392200  | 0.28967900  | F  | -4.97287000 | -5.04803500 | 1.79560200  |
| C | 2.46432300  | -1.49121800 | -0.16976700 | F  | 4.11267000  | 6.03770700  | -0.23361500 |
| C | 2.70701500  | -1.98718900 | -1.46591800 | F  | 3.82183000  | 5.14727900  | -2.21606100 |
| C | 2.84532500  | -2.24380800 | 0.95522700  | F  | 2.10789800  | 5.39338500  | -0.86916800 |
| C | 3.34188200  | -3.22858700 | -1.62231700 | F  | 6.87620300  | 0.50687500  | 1.23312900  |
| H | 2.40181000  | -1.40444700 | -2.33989900 | F  | 7.53762500  | 2.57023700  | 0.85463800  |
| C | 3.47742600  | -3.48457800 | 0.78279800  | F  | 6.47372800  | 2.07898300  | 2.70797600  |
| H | 2.65095200  | -1.87218800 | 1.96250700  | F  | 2.77520400  | -5.10883500 | 2.36593100  |
| C | 3.72806500  | -3.98057000 | -0.50401800 | F  | 4.88272400  | -5.13813400 | 1.76044700  |
| H | 4.21496100  | -4.94692200 | -0.63521700 | F  | 4.13280700  | -3.53752400 | 3.06970200  |
| C | -2.95266100 | 1.46174800  | 0.07466500  | F  | 3.81477900  | -5.08469700 | -3.03686400 |
| C | -4.88521500 | 3.48829100  | 0.25237600  | F  | 4.80442800  | -3.17888200 | -3.48855900 |
| C | -3.62035500 | 3.76669200  | -0.28484800 | F  | 2.66258300  | -3.41915500 | -3.89233600 |
| H | -5.63712500 | 4.27502700  | 0.31870300  | F  | -2.79013900 | 5.89422800  | 0.34977800  |
| C | -4.21737800 | 1.17582900  | 0.61418200  | F  | -2.33535700 | 5.20334700  | -1.68148900 |
| C | -5.18098900 | 2.19189100  | 0.69759800  | F  | -4.37512000 | 5.84376500  | -1.16534200 |
| H | -1.68280100 | 2.96458300  | -0.83636400 | F  | -7.13397400 | 2.94572000  | 1.82754300  |
| C | -2.65336900 | 2.75639700  | -0.38357500 | F  | -6.54174900 | 0.84653200  | 2.11260300  |
| H | -4.46234100 | 0.17381000  | 0.96883000  | F  | -7.39785300 | 1.49857400  | 0.20183100  |
| C | -2.48923400 | -1.45544100 | -0.15174600 |    |             |             |             |
